# Supplementary material for: Partnership Trajectories and Later-Life Health: The Role of Social and Genetic Factors
Source: Research Square preprint supplement (doi:10.21203/rs.3.rs-7292198/v1), 2025-09-05
Supplement: Supplementary file 1 [file 471ec7584640241c0e942ca8.xlsx]

## Sheet: Tab S1. Descriptive (non-His W)
Table S1. Descriptive statistics of the analytic sample with additional variables for robustness check (non-Hispanic White respondents)
	Non-Hispanic Whites
	All (N = 4,899)		Male (N = 1,962)		Female (N = 2,937)
Variable	Mean	S.D.	Mean	S.D.	Mean	S.D.
Health Outcomes
Self-rated Health	3.801	1.004	3.805	1.004	3.798	1.005
CESD Score	0.978	1.621	0.782	1.401	1.109	1.74
Partnership Trajectory Cluster
Never Married	0.057	-	0.066	-	0.051	-
Married Late	0.055	-	0.076	-	0.041	-
Married and Divorced	0.037	-	0.045	-	0.032	-
Married in 20s and Continuously Married	0.36	-	0.454	-	0.297	-
Married Early & Continuously	0.442	-	0.314	-	0.528	-
Married & Remarried	0.048	-	0.045	-	0.05	-
LCA Trajectory Cluster
Widowed	0.0136763	-	0.0050968	-	0.0194076	-
Never Married	0.0538885	-	0.0611621	-	0.0490296	-
Married Late	0.187589	-	0.268094	-	0.13381	-
Continuously Married	0.625842	-	0.545362	-	0.679605	-
Divorced Early and Remarried	0.0559298	-	0.0647299	-	0.0500511	-
Remarried	0.0630741	-	0.0555556	-	0.0680967	-
Socioeconomic Status
Years of Education	13.812	2.295	14.136	2.345	13.595	2.235
Mother's Education	11.161	2.934	11.415	2.88	10.99	2.957
Father's Education	10.859	3.495	11.085	3.485	10.709	3.494
Childhood SES
Poor	0.212	-	0.221	-	0.206	-
Average	0.689	-	0.682	-	0.694	-
Well off	0.086	-	0.084	-	0.087	-
Varied of Missing	0.013	-	0.013	-	0.014	-
Sex
Male	0.4	-	-	-	-	-
Female	0.6	-	-	-	-	-
Birth Year	1944.33	9.89	1944.4	9.55	1944.28	10.112
Birth Cohort
Cohorts 0-3; <1924 to 1947	0.422	-	0.425	-	0.421	-
Cohorts 4 & 5: 1948 to 1959	0.362	-	0.365	-	0.36	-
Cohorts 6 & 7: 1960 to 1971	0.215	-	0.21	-	0.219	-
Age Difference between Outcome Measured and Age 50
Age Difference: Self-rated Health	4.911	5.415	5.084	4.962	4.796	5.695
Age Difference: CESD	5.689	5.619	6.025	5.331	5.465	5.794
Polygenic Scores
Educational Attainment PGS	0.074	0.988	0.078	1.009	0.072	0.974
Well-being PGS	0.011	0.993	0.029	0.98	-0.001	1.002
Depressive Symptoms PGS	-0.039	1.015	-0.055	0.994	-0.028	1.028
BMI PGS	-0.034	0.999	-0.072	0.991	-0.009	1.004
General Cognition PGS	0.0716724	1.00713	0.115589	1.01884	0.0423349	0.998329

## Sheet: Tab S2. Multi logit cluster
Table S2. Multinomial logistic models for partnership trajectory clusters among non-Hispanic White respondents (reference = married in 20s and continuously married)
	Model 1 (Ref. = Married in 20s and Continuously Married)					Model 1 (Ref. = Married in 20s and Continuously Married)					Model 1 (Ref. = Married in 20s and Continuously Married)					Model 2 (Ref. = Married in 20s and Continuously Married)					Model 2 (Ref. = Married in 20s and Continuously Married)					Model 2 (Ref. = Married in 20s and Continuously Married)					Model 3 (Ref. = Married in 20s and Continuously Married)					Model 3 (Ref. = Married in 20s and Continuously Married)					Model 3 (Ref. = Married in 20s and Continuously Married)
	All					Male					Female					All					Male					Female					All					Male					Female
	Never Married	Married Late	Married & Divorced	Married Early & Continuously	Married & Remarried	Never Married	Married Late	Married & Divorced	Married Early & Continuously	Married & Remarried	Never Married	Married Late	Married & Divorced	Married Early & Continuously	Married & Remarried	Never Married	Married Late	Married & Divorced	Married Early & Continuously	Married & Remarried	Never Married	Married Late	Married & Divorced	Married Early & Continuously	Married & Remarried	Never Married	Married Late	Married & Divorced	Married Early & Continuously	Married & Remarried	Never Married	Married Late	Married & Divorced	Married Early & Continuously	Married & Remarried	Never Married	Married Late	Married & Divorced	Married Early & Continuously	Married & Remarried	Never Married	Married Late	Married & Divorced	Married Early & Continuously	Married & Remarried
VARIABLES	Coef (S.E.)	Coef (S.E.)	Coef (S.E.)	Coef (S.E.)	Coef (S.E.)	Coef (S.E.)	Coef (S.E.)	Coef (S.E.)	Coef (S.E.)	Coef (S.E.)	Coef (S.E.)	Coef (S.E.)	Coef (S.E.)	Coef (S.E.)	Coef (S.E.)	Coef (S.E.)	Coef (S.E.)	Coef (S.E.)	Coef (S.E.)	Coef (S.E.)	Coef (S.E.)	Coef (S.E.)	Coef (S.E.)	Coef (S.E.)	Coef (S.E.)	Coef (S.E.)	Coef (S.E.)	Coef (S.E.)	Coef (S.E.)	Coef (S.E.)	Coef (S.E.)	Coef (S.E.)	Coef (S.E.)	Coef (S.E.)	Coef (S.E.)	Coef (S.E.)	Coef (S.E.)	Coef (S.E.)	Coef (S.E.)	Coef (S.E.)	Coef (S.E.)	Coef (S.E.)	Coef (S.E.)	Coef (S.E.)	Coef (S.E.)
Polygenic Scores
Educational Attainment PGS	0.007	0.095	-0.195*	-0.208***	-0.347***	0.023	0.169+	-0.019	-0.157**	-0.440***	-0.020	0.015	-0.373**	-0.277***	-0.320**																0.045	0.128+	-0.099	-0.088*	-0.249**	0.052	0.161	0.058	-0.021	-0.393**	0.020	0.082	-0.245*	-0.138**	-0.187+
	(0.070)	(0.071)	(0.085)	(0.035)	(0.075)	(0.102)	(0.096)	(0.121)	(0.057)	(0.121)	(0.098)	(0.107)	(0.119)	(0.047)	(0.098)																(0.073)	(0.075)	(0.089)	(0.039)	(0.079)	(0.108)	(0.102)	(0.129)	(0.060)	(0.130)	(0.102)	(0.112)	(0.124)	(0.051)	(0.102)
Well-being PGS	-0.138+	-0.041	0.065	0.024	0.023	-0.240*	-0.167+	0.049	0.005	0.108	-0.053	0.094	0.070	0.062	0.001																-0.128+	-0.039	0.092	0.043	0.033	-0.248*	-0.181+	0.053	0.009	0.109	-0.042	0.107	0.111	0.077	0.010
	(0.071)	(0.072)	(0.086)	(0.036)	(0.077)	(0.107)	(0.101)	(0.125)	(0.060)	(0.127)	(0.097)	(0.106)	(0.120)	(0.047)	(0.097)																(0.072)	(0.073)	(0.087)	(0.038)	(0.078)	(0.109)	(0.103)	(0.128)	(0.061)	(0.129)	(0.097)	(0.107)	(0.122)	(0.049)	(0.098)
Depressive Symptoms PGS	-0.045	0.015	0.136	0.072*	-0.069	0.002	-0.036	0.197	0.134*	-0.011	-0.086	0.072	0.085	0.027	-0.119																-0.054	0.004	0.123	0.065+	-0.082	-0.013	-0.051	0.173	0.138*	-0.010	-0.091	0.062	0.092	0.026	-0.125
	(0.070)	(0.072)	(0.086)	(0.036)	(0.076)	(0.107)	(0.101)	(0.127)	(0.060)	(0.127)	(0.094)	(0.106)	(0.118)	(0.046)	(0.096)																(0.071)	(0.073)	(0.087)	(0.037)	(0.077)	(0.107)	(0.101)	(0.128)	(0.062)	(0.129)	(0.094)	(0.106)	(0.121)	(0.048)	(0.097)
BMI PGS	-0.014	-0.099	-0.016	0.008	0.034	0.040	-0.203+	0.172	0.123*	0.108	-0.076	0.029	-0.187	-0.075	-0.017																-0.031	-0.110	-0.030	-0.004	0.019	-0.009	-0.241*	0.135	0.130*	0.100	-0.080	0.025	-0.189	-0.081	-0.018
	(0.073)	(0.075)	(0.089)	(0.037)	(0.080)	(0.109)	(0.103)	(0.131)	(0.062)	(0.133)	(0.100)	(0.110)	(0.123)	(0.048)	(0.101)																(0.074)	(0.075)	(0.090)	(0.039)	(0.080)	(0.111)	(0.105)	(0.133)	(0.064)	(0.137)	(0.101)	(0.110)	(0.126)	(0.051)	(0.102)
Socioeconomic Status
Years of Education																-0.032	-0.028	-0.109**	-0.232***	-0.191***	-0.050	0.003	-0.090	-0.180***	-0.137*	-0.003	-0.057	-0.128*	-0.271***	-0.237***	-0.039	-0.049	-0.096*	-0.220***	-0.156***	-0.053	-0.026	-0.085	-0.165***	-0.078	-0.009	-0.066	-0.109+	-0.261***	-0.216***
																(0.033)	(0.033)	(0.039)	(0.017)	(0.035)	(0.047)	(0.045)	(0.055)	(0.025)	(0.054)	(0.046)	(0.051)	(0.057)	(0.023)	(0.047)	(0.034)	(0.035)	(0.041)	(0.018)	(0.036)	(0.050)	(0.047)	(0.058)	(0.026)	(0.058)	(0.048)	(0.052)	(0.060)	(0.024)	(0.048)
Mother's Education																-0.019	-0.006	-0.050	0.001	-0.001	-0.025	-0.001	-0.029	0.005	-0.050	-0.019	-0.010	-0.067	0.002	0.029	-0.012	-0.005	-0.066+	-0.006	0.003	-0.017	0.003	-0.054	-0.005	-0.036	-0.015	-0.013	-0.079	-0.005	0.025
																(0.030)	(0.030)	(0.036)	(0.015)	(0.033)	(0.046)	(0.043)	(0.053)	(0.024)	(0.054)	(0.040)	(0.044)	(0.050)	(0.020)	(0.041)	(0.030)	(0.031)	(0.037)	(0.015)	(0.033)	(0.046)	(0.043)	(0.056)	(0.025)	(0.056)	(0.040)	(0.044)	(0.051)	(0.020)	(0.042)
Father's Education																0.020	0.034	0.023	-0.011	0.007	0.040	0.055	0.056	-0.046*	-0.001	0.007	0.009	0.001	0.009	0.017	0.019	0.028	0.024	-0.009	0.013	0.043	0.059	0.055	-0.045*	0.003	0.007	0.004	0.006	0.012	0.024
																(0.025)	(0.026)	(0.031)	(0.013)	(0.027)	(0.039)	(0.036)	(0.046)	(0.020)	(0.046)	(0.034)	(0.037)	(0.041)	(0.017)	(0.034)	(0.025)	(0.026)	(0.031)	(0.013)	(0.028)	(0.039)	(0.037)	(0.047)	(0.021)	(0.046)	(0.034)	(0.037)	(0.042)	(0.017)	(0.035)
Childhood SES (Ref. = Poor)
Average																-0.206	-0.090	-0.455*	-0.034	0.042	-0.129	-0.019	-0.572*	-0.015	0.450	-0.304	-0.203	-0.345	-0.069	-0.201	-0.205	-0.108	-0.424*	-0.005	0.054	-0.160	-0.084	-0.520+	0.026	0.481	-0.319	-0.228	-0.348	-0.051	-0.169
																(0.167)	(0.175)	(0.195)	(0.086)	(0.188)	(0.254)	(0.244)	(0.269)	(0.133)	(0.337)	(0.222)	(0.251)	(0.287)	(0.116)	(0.231)	(0.167)	(0.176)	(0.197)	(0.087)	(0.189)	(0.256)	(0.248)	(0.273)	(0.135)	(0.342)	(0.224)	(0.253)	(0.290)	(0.117)	(0.233)
Well Off																-0.183	-0.190	-0.006	-0.223	0.061	-0.044	-0.206	-0.919+	-0.240	0.361	-0.366	-0.236	0.587	-0.206	-0.082	-0.192	-0.225	0.007	-0.188	0.156	-0.113	-0.287	-0.845	-0.159	0.429	-0.378	-0.315	0.513	-0.201	0.014
																(0.260)	(0.273)	(0.294)	(0.147)	(0.294)	(0.387)	(0.380)	(0.509)	(0.249)	(0.513)	(0.355)	(0.395)	(0.382)	(0.186)	(0.363)	(0.262)	(0.276)	(0.297)	(0.148)	(0.295)	(0.394)	(0.388)	(0.516)	(0.251)	(0.518)	(0.359)	(0.401)	(0.391)	(0.189)	(0.366)
Varied or Missing																-0.285	0.350	-0.344	0.096	-0.317	0.407	0.580	-0.284	-0.049	-12.193	-0.944	0.038	-0.373	0.118	-0.186	-0.271	0.373	-0.324	0.154	-0.282	0.495	0.650	-0.428	-0.069	-12.573	-0.993	0.012	-0.382	0.214	-0.087
																(0.636)	(0.522)	(0.765)	(0.301)	(0.765)	(0.815)	(0.696)	(1.078)	(0.499)	(610.725)	(1.065)	(0.804)	(1.088)	(0.390)	(0.802)	(0.637)	(0.524)	(0.768)	(0.301)	(0.765)	(0.818)	(0.705)	(1.086)	(0.503)	(722.899)	(1.068)	(0.812)	(1.100)	(0.393)	(0.805)
Female																0.104	-0.243+	-0.013	0.889***	0.460**											0.111	-0.248+	0.005	0.910***	0.481***
																(0.130)	(0.132)	(0.158)	(0.070)	(0.144)											(0.131)	(0.133)	(0.159)	(0.071)	(0.145)
Birth Year																0.063***	0.055***	0.093***	0.005	0.068***	0.092***	0.057**	0.101***	0.011	0.083**	0.049***	0.056***	0.104***	0.001	0.061***	0.063***	0.058***	0.093***	0.004	0.066***	0.094***	0.063**	0.105***	0.010	0.078**	0.051***	0.058***	0.102***	0.000	0.059***
																(0.012)	(0.013)	(0.014)	(0.007)	(0.013)	(0.021)	(0.022)	(0.023)	(0.013)	(0.028)	(0.015)	(0.016)	(0.019)	(0.009)	(0.015)	(0.012)	(0.013)	(0.014)	(0.007)	(0.013)	(0.022)	(0.022)	(0.023)	(0.013)	(0.029)	(0.015)	(0.016)	(0.019)	(0.009)	(0.015)
Birth Cohort (Ref. = Cohorts 0-3; <1924 to 1947)
Cohorts 4 & 5: 1948 to 1959																-0.328	-0.400+	0.364	-0.070	0.224	-0.309	-0.399	-0.323	-0.050	0.543	-0.482+	-0.437	1.086**	-0.104	0.034	-0.363+	-0.419+	0.384	-0.049	0.222	-0.339	-0.448	-0.372	-0.042	0.576	-0.547*	-0.447	1.110**	-0.090	0.040
																(0.205)	(0.213)	(0.239)	(0.115)	(0.221)	(0.338)	(0.338)	(0.365)	(0.195)	(0.441)	(0.266)	(0.283)	(0.371)	(0.146)	(0.263)	(0.207)	(0.214)	(0.240)	(0.116)	(0.223)	(0.341)	(0.346)	(0.373)	(0.197)	(0.450)	(0.269)	(0.285)	(0.375)	(0.147)	(0.264)
Cohorts 6 & 7: 1960 to 1971																-0.340	-0.360	-0.539+	-0.706***	-0.234	-0.369	-0.110	-0.921+	-0.682*	0.207	-0.523	-0.651+	-0.223	-0.773***	-0.507	-0.382	-0.404	-0.519	-0.681***	-0.224	-0.439	-0.200	-0.949+	-0.650*	0.319	-0.574	-0.669+	-0.197	-0.756***	-0.485
																(0.286)	(0.300)	(0.325)	(0.182)	(0.313)	(0.481)	(0.498)	(0.524)	(0.317)	(0.634)	(0.364)	(0.384)	(0.452)	(0.225)	(0.368)	(0.287)	(0.303)	(0.327)	(0.183)	(0.315)	(0.487)	(0.511)	(0.538)	(0.319)	(0.649)	(0.366)	(0.388)	(0.460)	(0.227)	(0.370)
Population Stratification
PC1_5A	-0.888	-5.432	16.323+	-0.011	-27.245*	-3.258	-10.275	20.459	-2.497	-42.417*	1.785	1.031	17.435	4.794	-14.263																-0.401	-5.638	20.073*	7.885+	-25.271*	-3.742	-12.182	24.352	2.559	-39.716+	1.641	3.463	19.909	12.253*	-12.469
	(6.991)	(6.428)	(9.458)	(3.836)	(12.058)	(10.034)	(9.131)	(15.837)	(6.626)	(20.985)	(9.862)	(9.198)	(11.995)	(5.053)	(15.230)																(7.263)	(6.668)	(9.825)	(4.051)	(12.403)	(10.463)	(9.456)	(16.353)	(6.782)	(21.055)	(10.297)	(9.593)	(12.622)	(5.283)	(15.765)
PC1_5B	-9.144	10.122	7.135	3.847	5.467	-4.364	7.725	-0.338	5.453	6.053	-14.558+	13.531	11.852	1.856	4.551																-8.672	10.567	10.532	2.927	7.424	-3.186	7.349	2.696	5.336	12.214	-14.699	14.419	15.482	0.463	4.132
	(6.327)	(7.663)	(9.136)	(3.683)	(8.179)	(9.180)	(9.810)	(12.582)	(6.105)	(13.475)	(8.807)	(12.378)	(13.489)	(4.880)	(10.407)																(6.480)	(7.847)	(9.372)	(3.886)	(8.455)	(9.587)	(10.158)	(13.015)	(6.192)	(14.081)	(9.030)	(12.679)	(13.819)	(5.108)	(10.719)
PC1_5C	2.099	-5.575	-3.678	5.280	13.559	-4.609	-12.390	2.508	4.772	29.201+	7.394	-0.250	-9.437	8.053	8.420																2.354	-5.430	-2.218	6.177	14.721	-3.857	-12.353	2.861	3.524	31.046*	7.308	0.350	-10.995	8.060	8.074
	(8.197)	(8.362)	(9.967)	(4.137)	(8.883)	(12.285)	(11.607)	(14.630)	(6.948)	(15.042)	(11.186)	(12.262)	(13.707)	(5.406)	(11.207)																(8.293)	(8.441)	(10.108)	(4.371)	(9.002)	(12.595)	(11.828)	(14.991)	(7.159)	(15.537)	(11.250)	(12.256)	(13.881)	(5.622)	(11.272)
PC1_5D	-9.746	-19.454**	-5.724	7.211*	7.877	-19.713*	-22.242*	2.063	13.604*	5.794	0.275	-15.149	-10.398	4.449	8.768																-9.322	-18.897**	-5.240	5.904	8.863	-19.972+	-22.993*	0.422	10.607+	7.511	0.080	-14.864	-7.900	5.361	11.384
	(6.964)	(6.911)	(8.388)	(3.566)	(7.949)	(9.825)	(9.217)	(11.850)	(5.846)	(13.400)	(9.863)	(10.578)	(11.950)	(4.737)	(10.030)																(7.093)	(7.029)	(8.621)	(3.758)	(8.159)	(10.198)	(9.503)	(12.228)	(5.987)	(13.651)	(10.024)	(10.812)	(12.248)	(4.946)	(10.339)
PC1_5E	3.772	-5.332	12.130	16.995***	21.896+	5.222	2.190	27.803+	21.856***	15.150	0.513	-13.124	-1.066	12.498*	25.755																3.290	-6.339	12.101	13.044**	21.051+	4.252	0.670	27.627+	19.188**	13.751	-0.527	-15.219	1.456	7.749	24.602
	(6.855)	(6.285)	(9.112)	(3.781)	(12.216)	(9.736)	(8.846)	(15.140)	(6.522)	(20.877)	(9.792)	(9.069)	(11.654)	(5.014)	(15.709)																(7.074)	(6.463)	(9.447)	(3.980)	(12.601)	(10.137)	(9.168)	(15.750)	(6.636)	(20.881)	(10.131)	(9.360)	(12.278)	(5.230)	(16.324)
PC6_10A	-6.133	-1.911	10.132	1.033	-1.853	-8.866	0.794	13.770	3.843	-2.894	-4.059	-5.697	9.621	1.117	-0.152																-5.365	-1.375	13.523	3.331	1.291	-5.459	2.875	19.042	4.930	1.680	-4.423	-6.172	10.691	2.174	0.842
	(7.129)	(7.305)	(8.651)	(3.599)	(7.729)	(10.733)	(10.216)	(12.751)	(5.973)	(12.741)	(9.665)	(10.719)	(11.994)	(4.721)	(9.789)																(7.251)	(7.439)	(8.887)	(3.793)	(7.871)	(11.053)	(10.471)	(13.060)	(6.121)	(13.169)	(9.788)	(10.878)	(12.428)	(4.909)	(9.932)
PC6_10B	-12.717+	-9.352	-1.963	-5.952+	-4.063	3.261	-5.942	1.948	-2.589	-3.412	-27.450**	-11.983	-6.877	-10.549*	-6.104																-13.341+	-9.603	-1.397	-7.373+	-4.570	6.002	-5.150	3.506	-4.992	0.780	-29.107**	-12.489	-5.290	-8.655+	-4.763
	(7.097)	(7.198)	(8.673)	(3.585)	(7.664)	(10.297)	(9.641)	(12.432)	(5.835)	(12.417)	(9.821)	(10.805)	(12.138)	(4.793)	(9.934)																(7.266)	(7.339)	(8.903)	(3.770)	(7.896)	(10.703)	(9.964)	(12.715)	(5.976)	(12.965)	(10.011)	(11.023)	(12.658)	(4.974)	(10.199)
PC6_10C	-4.195	10.255	9.964	5.378	8.509	1.375	12.341	18.495	3.296	-3.689	-8.032	8.754	3.023	7.767	15.229																-4.051	10.423	10.157	6.651+	8.751	3.958	14.864	19.578	2.290	-2.523	-9.357	7.806	2.388	9.257+	14.307
	(7.121)	(7.270)	(8.822)	(3.614)	(7.795)	(10.508)	(9.899)	(13.095)	(5.980)	(13.034)	(9.731)	(10.842)	(12.084)	(4.782)	(9.903)																(7.267)	(7.396)	(9.040)	(3.809)	(7.922)	(10.841)	(10.162)	(13.379)	(6.107)	(13.398)	(9.936)	(11.064)	(12.401)	(4.978)	(10.051)
PC6_10D	0.207	13.203+	-9.578	-1.371	12.421	-3.962	19.498*	3.076	0.761	16.496	3.148	6.191	-20.639+	-4.683	7.148																-0.178	13.176+	-10.130	-1.464	11.694	-3.941	21.562*	2.124	1.233	18.952	2.454	5.266	-19.100	-3.308	6.578
	(7.012)	(7.151)	(8.550)	(3.547)	(7.601)	(10.246)	(9.694)	(12.205)	(5.767)	(12.320)	(9.696)	(10.712)	(12.043)	(4.725)	(9.769)																(7.104)	(7.228)	(8.674)	(3.735)	(7.739)	(10.571)	(9.958)	(12.444)	(5.879)	(12.723)	(9.765)	(10.786)	(12.268)	(4.927)	(9.935)
PC6_10E	6.466	-2.843	-5.819	3.676	-4.427	2.229	-2.542	-28.194*	-0.259	-2.476	10.749	-2.954	19.613	7.309	-3.592																5.599	-2.991	-6.176	4.322	-4.637	0.935	-2.449	-29.400**	-1.159	-5.173	10.669	-3.203	20.240	8.638+	-2.396
	(7.266)	(7.117)	(8.507)	(3.589)	(7.485)	(10.431)	(9.536)	(11.206)	(5.794)	(12.253)	(10.138)	(10.673)	(13.025)	(4.811)	(9.634)																(7.299)	(7.116)	(8.628)	(3.787)	(7.612)	(10.604)	(9.667)	(11.409)	(5.959)	(12.482)	(10.170)	(10.725)	(13.387)	(5.009)	(9.817)
Constant	-1.858***	-1.930***	-2.274***	0.220***	-2.041***	-1.954***	-1.901***	-2.381***	-0.362***	-2.439***	-1.781***	-1.997***	-2.243***	0.606***	-1.774***	-123.313***	-108.609***	-180.945***	-6.030	-132.462***	-180.176***	-113.527**	-196.667***	-19.584	-161.922**	-96.596***	-109.044***	-202.276***	1.782	-116.590***	-124.632***	-113.501***	-181.547***	-4.091	-128.839***	-184.264***	-123.840**	-205.301***	-17.019	-153.869**	-99.791***	-113.010***	-198.936***	3.895	-113.037***
	(0.067)	(0.070)	(0.080)	(0.033)	(0.074)	(0.099)	(0.099)	(0.122)	(0.054)	(0.130)	(0.094)	(0.103)	(0.114)	(0.043)	(0.094)	(23.315)	(24.538)	(26.328)	(13.663)	(25.302)	(41.352)	(42.315)	(44.015)	(24.325)	(53.829)	(28.592)	(30.059)	(36.882)	(16.795)	(28.833)	(23.413)	(24.716)	(26.559)	(13.751)	(25.567)	(41.965)	(43.485)	(45.410)	(24.491)	(55.213)	(28.750)	(30.429)	(37.543)	(16.944)	(29.013)
Observations	4,922					1,965					2,957					4,922					1,965					2,957					4,922					1,965					2,957
Pseudo R-squared	0.0147					0.0261					0.0170					0.0726					0.0581					0.0622					0.0828					0.0794					0.0748
(-2)Log-likelihood	12836					5272					7248					12082					5098					6916					11950					4982					6822
Chi-squared	192.0					141.2					125.3					946.1					314.2					458.7					1078					429.8					551.9
Standard errors in parentheses
*** p<0.001, ** p<0.01, * p<0.05, + p<0.1

## Sheet: Tab S3. Ordered logit SRH
Table S3. Ordered logit models for self-rated health among non-Hispanic White respondents
	Model 1			Model 2			Model 3			Model 4			Model 5
	Cluster			PGS			Cluster + PGS			Clusters + SES			Cluster + PGS + SES
	All	Male	Female	All	Male	Female	All	Male	Female	All	Male	Female	All	Male	Female
VARIABLES	Coef (S.E.)	Coef (S.E.)	Coef (S.E.)	Coef (S.E.)	Coef (S.E.)	Coef (S.E.)	Coef (S.E.)	Coef (S.E.)	Coef (S.E.)	Coef (S.E.)	Coef (S.E.)	Coef (S.E.)	Coef (S.E.)	Coef (S.E.)	Coef (S.E.)
Partnership Trajectory (Ref. = Married in the 20s)
Never Married	-0.409***	-0.528**	-0.295+				-0.403***	-0.525**	-0.304+	-0.260*	-0.319+	-0.215	-0.261*	-0.324+	-0.236
	(0.117)	(0.169)	(0.163)				(0.118)	(0.170)	(0.164)	(0.118)	(0.172)	(0.163)	(0.118)	(0.173)	(0.164)
Married Late	0.037	0.103	-0.055				0.012	0.029	-0.064	0.170	0.252	0.042	0.154	0.195	0.036
	(0.118)	(0.159)	(0.175)				(0.119)	(0.161)	(0.177)	(0.120)	(0.164)	(0.178)	(0.121)	(0.166)	(0.179)
Married and Divorced	-0.488***	-0.368+	-0.593**				-0.439**	-0.285	-0.586**	-0.252+	-0.134	-0.376+	-0.232	-0.067	-0.400*
	(0.140)	(0.203)	(0.194)				(0.141)	(0.204)	(0.196)	(0.141)	(0.204)	(0.195)	(0.142)	(0.205)	(0.198)
Married Early and Continuously	-0.127*	-0.217*	-0.072				-0.072	-0.131	-0.051	-0.011	-0.051	0.001	0.003	-0.005	-0.009
	(0.058)	(0.095)	(0.077)				(0.059)	(0.097)	(0.077)	(0.062)	(0.099)	(0.081)	(0.063)	(0.100)	(0.082)
Married and Remarried	-0.191	-0.407*	-0.043				-0.121	-0.273	-0.014	0.097	-0.062	0.190	0.101	-0.024	0.174
	(0.127)	(0.201)	(0.164)				(0.128)	(0.204)	(0.165)	(0.130)	(0.207)	(0.167)	(0.130)	(0.209)	(0.168)
Polygenic Scores
Educational Attainment PGS				0.133***	0.192***	0.092*	0.130***	0.186***	0.088*				0.012	0.071	-0.034
				(0.028)	(0.045)	(0.037)	(0.028)	(0.045)	(0.037)				(0.030)	(0.047)	(0.039)
Well-being PGS				0.111***	0.057	0.144***	0.109***	0.052	0.143***				0.097***	0.039	0.131***
				(0.029)	(0.047)	(0.037)	(0.029)	(0.047)	(0.037)				(0.029)	(0.047)	(0.037)
Depressive Symptoms PGS				-0.061*	-0.058	-0.065+	-0.061*	-0.055	-0.066+				-0.067*	-0.075	-0.064+
				(0.028)	(0.046)	(0.036)	(0.029)	(0.046)	(0.036)				(0.029)	(0.047)	(0.037)
BMI PGS				-0.202***	-0.254***	-0.167***	-0.201***	-0.250***	-0.168***				-0.211***	-0.250***	-0.185***
				(0.030)	(0.048)	(0.038)	(0.030)	(0.048)	(0.038)				(0.030)	(0.049)	(0.039)
Socioeconomic Status
Years of Education										0.160***	0.179***	0.146***	0.153***	0.164***	0.147***
										(0.013)	(0.020)	(0.018)	(0.014)	(0.021)	(0.018)
Mother's Education										0.046***	0.049*	0.046**	0.048***	0.058**	0.047**
										(0.012)	(0.019)	(0.015)	(0.012)	(0.020)	(0.015)
Father's Education										0.010	0.014	0.008	0.009	0.010	0.008
										(0.010)	(0.016)	(0.013)	(0.010)	(0.016)	(0.013)
Childhood SES (Ref. = Poor)
Average										0.229***	0.226*	0.223*	0.202**	0.204+	0.189*
										(0.067)	(0.106)	(0.087)	(0.067)	(0.107)	(0.087)
Well Off										0.206+	0.074	0.296*	0.184	0.052	0.267+
										(0.113)	(0.181)	(0.146)	(0.114)	(0.182)	(0.147)
Varied or Missing										0.303	0.567	0.130	0.287	0.563	0.101
										(0.231)	(0.383)	(0.291)	(0.232)	(0.387)	(0.294)
Female										0.074			0.087
										(0.055)			(0.055)
Birth Year										-0.043***	-0.036**	-0.046***	-0.041***	-0.038**	-0.045***
										(0.008)	(0.014)	(0.009)	(0.008)	(0.014)	(0.010)
Birth Cohort (Ref. = Cohorts 0-3; <1924 to 1947)
Cohorts 4 & 5: 1948 to 1959										-0.264**	-0.296+	-0.269*	-0.293**	-0.260	-0.304**
										(0.095)	(0.171)	(0.116)	(0.096)	(0.172)	(0.117)
Cohorts 6 & 7: 1960 to 1971										-0.301+	-0.386	-0.271	-0.341*	-0.328	-0.317
										(0.160)	(0.283)	(0.195)	(0.161)	(0.284)	(0.197)
Age Outcome was Measured										-0.053***	-0.047***	-0.057***	-0.054***	-0.049***	-0.057***
										(0.008)	(0.013)	(0.010)	(0.008)	(0.013)	(0.010)
Population Stratification
PC1_5A				2.044	3.624	0.706	2.279	3.464	1.099				-2.892	-1.805	-4.450
				(3.034)	(4.614)	(4.093)	(3.037)	(4.623)	(4.104)				(3.108)	(4.733)	(4.209)
PC1_5B				-3.039	-0.170	-5.255	-3.254	-0.296	-5.324				-5.231+	-1.832	-7.845*
				(2.884)	(4.530)	(3.751)	(2.889)	(4.547)	(3.759)				(2.938)	(4.623)	(3.819)
PC1_5C				-4.153	-7.232	-1.941	-4.001	-6.873	-2.002				-3.078	-5.207	-1.354
				(3.339)	(5.399)	(4.262)	(3.342)	(5.414)	(4.266)				(3.374)	(5.491)	(4.305)
PC1_5D				3.044	8.952*	-1.148	2.741	8.776+	-1.533				2.587	9.979*	-2.629
				(2.837)	(4.458)	(3.700)	(2.847)	(4.488)	(3.707)				(2.881)	(4.574)	(3.746)
PC1_5E				-5.757+	-6.008	-4.052	-5.550+	-5.493	-4.347				-4.500	-4.477	-3.362
				(2.995)	(4.502)	(4.088)	(3.002)	(4.513)	(4.106)				(3.062)	(4.614)	(4.192)
PC6_10A				5.065+	5.255	5.178	5.106+	5.158	5.325				3.676	2.454	4.499
				(2.893)	(4.641)	(3.712)	(2.895)	(4.645)	(3.716)				(2.924)	(4.698)	(3.749)
PC6_10B				1.636	3.146	1.094	1.460	3.307	0.736				1.600	3.220	1.199
				(2.880)	(4.505)	(3.761)	(2.881)	(4.508)	(3.766)				(2.914)	(4.579)	(3.811)
PC6_10C				-1.083	2.757	-2.889	-1.035	2.816	-2.936				-0.978	2.408	-2.684
				(2.907)	(4.661)	(3.741)	(2.909)	(4.663)	(3.746)				(2.935)	(4.717)	(3.784)
PC6_10D				-1.236	8.744+	-7.828*	-1.396	8.869*	-8.210*				-1.215	8.964*	-7.689*
				(2.846)	(4.498)	(3.698)	(2.850)	(4.511)	(3.704)				(2.875)	(4.555)	(3.746)
PC6_10E				0.151	1.293	-0.811	0.166	1.155	-0.416				0.579	3.530	-1.034
				(2.871)	(4.428)	(3.784)	(2.871)	(4.437)	(3.787)				(2.894)	(4.485)	(3.823)
/cut1	-3.859***	-3.875***	-3.841***	-3.767***	-3.762***	-3.784***	-3.850***	-3.874***	-3.855***	-84.704***	-70.969**	-90.864***	-81.264***	-74.651**	-88.257***
	(0.102)	(0.157)	(0.134)	(0.095)	(0.150)	(0.124)	(0.102)	(0.157)	(0.135)	(15.055)	(26.976)	(18.328)	(15.129)	(27.079)	(18.496)
/cut2	-2.299***	-2.387***	-2.233***	-2.200***	-2.264***	-2.171***	-2.281***	-2.373***	-2.240***	-83.108***	-69.440*	-89.225***	-79.661***	-73.112**	-86.612***
	(0.059)	(0.091)	(0.080)	(0.048)	(0.077)	(0.061)	(0.060)	(0.091)	(0.080)	(15.054)	(26.974)	(18.327)	(15.128)	(27.077)	(18.495)
/cut3	-0.714***	-0.721***	-0.700***	-0.597***	-0.565***	-0.622***	-0.675***	-0.669***	-0.688***	-81.447***	-67.682*	-87.624***	-77.983***	-71.325**	-84.993***
	(0.046)	(0.066)	(0.064)	(0.030)	(0.048)	(0.039)	(0.046)	(0.067)	(0.065)	(15.052)	(26.971)	(18.325)	(15.126)	(27.075)	(18.493)
/cut4	0.855***	0.810***	0.897***	0.998***	1.005***	0.998***	0.925***	0.909***	0.937***	-79.776***	-66.038*	-85.932***	-76.292***	-69.649*	-83.279***
	(0.047)	(0.067)	(0.065)	(0.032)	(0.052)	(0.042)	(0.047)	(0.069)	(0.066)	(15.051)	(26.970)	(18.322)	(15.125)	(27.073)	(18.490)
Observations	4,899	1,962	2,937	4,899	1,962	2,937	4,899	1,962	2,937	4,899	1,962	2,937	4,899	1,962	2,937
Pseudo R-squared	0.00184	0.00347	0.00146	0.00998	0.0165	0.00853	0.0115	0.0188	0.00998	0.0344	0.0408	0.0312	0.0407	0.0509	0.0380
(-2)Log-likelihood	13266	5294	7964	13158	5224	7908	13138	5212	7896	12834	5096	7726	12750	5042	7672
Chi-squared	24.42	18.42	11.61	132.6	87.67	68.04	152.7	100.1	79.62	456.6	216.5	249.1	540.4	270.4	302.7
Standard errors in parentheses
*** p<0.001, ** p<0.01, * p<0.05, + p<0.1

## Sheet: Tab S4. Neg binom CESD
Table S4. Negative binomial models for CESD score among non-Hispanic White respondents
	Model 1			Model 2			Model 3			Model 4			Model 5
	Cluster			PGS			Cluster + PGS			Clusters + SES			Cluster + PGS + SES
	All	Male	Female	All	Male	Female	All	Male	Female	All	Male	Female	All	Male	Female
VARIABLES	Coef (S.E.)	Coef (S.E.)	Coef (S.E.)	Coef (S.E.)	Coef (S.E.)	Coef (S.E.)	Coef (S.E.)	Coef (S.E.)	Coef (S.E.)	Coef (S.E.)	Coef (S.E.)	Coef (S.E.)	Coef (S.E.)	Coef (S.E.)	Coef (S.E.)
Partnership Trajectory (Ref. = Married in the 20s)
Never Married	0.349***	0.551***	0.176				0.334**	0.516***	0.172	0.246*	0.348*	0.143	0.237*	0.334*	0.144
	(0.105)	(0.157)	(0.140)				(0.104)	(0.156)	(0.139)	(0.103)	(0.157)	(0.138)	(0.103)	(0.157)	(0.137)
Married Late	0.071	0.164	0.016				0.085	0.177	0.016	0.063	0.100	-0.004	0.066	0.116	-0.025
	(0.111)	(0.156)	(0.157)				(0.111)	(0.156)	(0.157)	(0.109)	(0.154)	(0.155)	(0.109)	(0.154)	(0.155)
Married and Divorced	0.294*	0.408*	0.198				0.283*	0.377*	0.209	0.147	0.275	0.037	0.141	0.258	0.065
	(0.128)	(0.189)	(0.172)				(0.128)	(0.189)	(0.171)	(0.126)	(0.187)	(0.170)	(0.125)	(0.187)	(0.169)
Married Early and Continuously	0.089	-0.073	0.040				0.081	-0.084	0.036	-0.037	-0.134	0.003	-0.030	-0.133	0.018
	(0.055)	(0.096)	(0.069)				(0.055)	(0.097)	(0.069)	(0.056)	(0.096)	(0.070)	(0.057)	(0.097)	(0.070)
Married and Remarried	0.236*	-0.170	0.311*				0.227*	-0.212	0.317*	0.022	-0.351+	0.185	0.035	-0.364+	0.212
	(0.115)	(0.209)	(0.138)				(0.114)	(0.210)	(0.138)	(0.113)	(0.207)	(0.136)	(0.113)	(0.207)	(0.136)
Polygenic Scores
Educational Attainment PGS				-0.045+	-0.043	-0.044	-0.040	-0.049	-0.040				0.018	-0.000	0.038
				(0.026)	(0.042)	(0.032)	(0.026)	(0.041)	(0.033)				(0.026)	(0.042)	(0.034)
Well-being PGS				-0.082**	-0.073	-0.084**	-0.080**	-0.063	-0.083**				-0.071**	-0.055	-0.078*
				(0.026)	(0.046)	(0.032)	(0.026)	(0.046)	(0.032)				(0.026)	(0.045)	(0.032)
Depressive Symptoms PGS				0.100***	0.100*	0.094**	0.100***	0.099*	0.097**				0.100***	0.111*	0.093**
				(0.027)	(0.046)	(0.033)	(0.027)	(0.046)	(0.033)				(0.026)	(0.046)	(0.032)
BMI PGS				0.048+	0.071	0.029	0.048+	0.071	0.029				0.034	0.055	0.024
				(0.028)	(0.047)	(0.034)	(0.028)	(0.047)	(0.034)				(0.027)	(0.046)	(0.034)
Socioeconomic Status
Years of Education										-0.080***	-0.063***	-0.093***	-0.081***	-0.063**	-0.095***
										(0.012)	(0.019)	(0.015)	(0.012)	(0.019)	(0.016)
Mother's Education										-0.027*	-0.032+	-0.022+	-0.020+	-0.026	-0.015
										(0.011)	(0.018)	(0.013)	(0.011)	(0.018)	(0.013)
Father's Education										0.007	0.005	0.006	0.003	0.004	0.000
										(0.009)	(0.015)	(0.011)	(0.009)	(0.015)	(0.011)
Childhood SES (Ref. = Poor)
Average										-0.204***	-0.179+	-0.208**	-0.197***	-0.151	-0.212**
										(0.059)	(0.099)	(0.073)	(0.059)	(0.099)	(0.073)
Well Off										-0.014	0.074	-0.047	-0.044	0.076	-0.102
										(0.099)	(0.168)	(0.123)	(0.099)	(0.168)	(0.123)
Varied or Missing										-0.364	-0.332	-0.402	-0.355	-0.335	-0.381
										(0.223)	(0.399)	(0.267)	(0.223)	(0.402)	(0.268)
Female										0.341***			0.331***
										(0.051)			(0.051)
Birth Year										0.014+	-0.008	0.024**	0.014+	-0.010	0.025**
										(0.007)	(0.014)	(0.009)	(0.007)	(0.014)	(0.009)
Birth Cohort (Ref. = Cohorts 0-3; <1924 to 1947)
Cohorts 4 & 5: 1948 to 1959										0.348***	0.679***	0.194+	0.348***	0.691***	0.190+
										(0.086)	(0.159)	(0.104)	(0.086)	(0.159)	(0.104)
Cohorts 6 & 7: 1960 to 1971										0.378**	0.868**	0.150	0.381**	0.906***	0.127
										(0.143)	(0.268)	(0.172)	(0.143)	(0.268)	(0.172)
Age Outcome was Measured										0.011	-0.005	0.018+	0.010	-0.005	0.017+
										(0.008)	(0.013)	(0.009)	(0.008)	(0.013)	(0.009)
Population Stratification
PC1_5A				-2.696	-2.439	-1.965	-2.747	-3.595	-1.832				-0.802	-2.127	-0.371
				(2.698)	(4.358)	(3.434)	(2.694)	(4.348)	(3.427)				(2.659)	(4.335)	(3.405)
PC1_5B				1.195	-8.494+	6.573+	1.354	-7.666+	6.780+				1.221	-5.986	6.491+
				(2.750)	(4.463)	(3.481)	(2.750)	(4.457)	(3.479)				(2.702)	(4.359)	(3.451)
PC1_5C				0.891	-2.853	2.952	0.556	-2.172	2.546				-0.595	-2.998	1.090
				(3.080)	(5.386)	(3.743)	(3.078)	(5.354)	(3.746)				(3.019)	(5.297)	(3.689)
PC1_5D				-0.300	0.936	-1.057	0.026	2.428	-1.034				0.878	3.990	0.212
				(2.775)	(4.684)	(3.437)	(2.778)	(4.675)	(3.438)				(2.711)	(4.602)	(3.383)
PC1_5E				-7.050**	-3.685	-9.282**	-7.244**	-3.470	-9.539**				-7.473**	-4.619	-9.970**
				(2.636)	(4.247)	(3.379)	(2.639)	(4.249)	(3.384)				(2.583)	(4.197)	(3.338)
PC6_10A				-3.294	-3.984	-2.392	-3.267	-3.965	-2.373				-3.298	-2.432	-3.736
				(2.667)	(4.606)	(3.246)	(2.667)	(4.586)	(3.247)				(2.616)	(4.502)	(3.206)
PC6_10B				-0.904	-6.542	1.374	-0.878	-6.931	1.061				-0.952	-5.653	2.095
				(2.704)	(4.460)	(3.383)	(2.703)	(4.439)	(3.393)				(2.644)	(4.376)	(3.332)
PC6_10C				-2.050	-3.462	-0.925	-2.103	-3.757	-1.177				-2.292	-4.171	-1.871
				(2.647)	(4.614)	(3.219)	(2.648)	(4.593)	(3.227)				(2.600)	(4.513)	(3.194)
PC6_10D				-2.218	-2.100	-1.937	-1.866	-2.018	-1.816				-3.118	-2.479	-2.988
				(2.641)	(4.479)	(3.266)	(2.640)	(4.451)	(3.268)				(2.588)	(4.378)	(3.229)
PC6_10E				-2.298	-0.388	-3.500	-2.494	-0.835	-3.520				-2.709	-1.618	-3.555
				(2.688)	(4.467)	(3.349)	(2.688)	(4.454)	(3.356)				(2.627)	(4.384)	(3.298)
/lnalpha	0.603***	0.661***	0.524***	0.580***	0.653***	0.493***	0.571***	0.617***	0.486***	0.480***	0.534***	0.435***	0.453***	0.502***	0.400***
	(0.042)	(0.073)	(0.052)	(0.042)	(0.073)	(0.052)	(0.042)	(0.075)	(0.053)	(0.044)	(0.077)	(0.054)	(0.044)	(0.078)	(0.054)
Constant	-0.113**	-0.300***	0.048	-0.029	-0.255***	0.094**	-0.114**	-0.299***	0.040	-26.218+	15.603	-45.755**	-25.809+	19.906	-47.573**
	(0.041)	(0.061)	(0.055)	(0.024)	(0.041)	(0.030)	(0.041)	(0.061)	(0.055)	(14.229)	(26.648)	(17.136)	(14.181)	(26.669)	(17.122)
Observations	4,899	1,962	2,937	4,899	1,962	2,937	4,899	1,962	2,937	4,899	1,962	2,937	4,899	1,962	2,937
Pseudo R-squared	0.00129	0.00464	0.000837	0.00446	0.00588	0.00513	0.00565	0.0102	0.00601	0.0179	0.0208	0.0131	0.0215	0.0252	0.0178
(-2)Log-likelihood	13226	4692	8470	13184	4686	8432	13168	4666	8426	13006	4616	8366	12958	4594	8326
Chi-squared	17.04	21.89	7.096	59.07	27.71	43.45	74.78	48.25	50.93	237.1	98.02	110.9	285.1	118.9	150.9
Standard errors in parentheses
*** p<0.001, ** p<0.01, * p<0.05, + p<0.1

## Sheet: Tab S5. Interaction terms
Table S5. Including interactions terms in ordered logit models for self-rated health and negative binomial models for CESD score among non-Hispanic White respondents
	Self-rated Health				CESD Score
	Model 1	Model 2	Model 3	Model 4	Model 5
	All	Male	Female	Three-way	All
VARIABLES	Coef (S.E.)	Coef (S.E.)	Coef (S.E.)	Coef (S.E.)	Coef (S.E.)
Partnership Trajectory (Ref. = Married in the 20s)
Never Married	-0.296+	-0.316+	-0.215	-0.297+	0.342*
	(0.170)	(0.175)	(0.165)	(0.173)	(0.150)
Married Late	0.242	0.188	0.074	0.230	0.115
	(0.163)	(0.166)	(0.180)	(0.164)	(0.150)
Married and Divorced	-0.077	-0.106	-0.414*	-0.112	0.242
	(0.202)	(0.206)	(0.196)	(0.203)	(0.181)
Married Early and Continuously	-0.031	-0.009	-0.008	-0.037	-0.155+
	(0.098)	(0.100)	(0.082)	(0.098)	(0.093)
Married and Remarried	-0.038	-0.024	0.174	-0.035	-0.346+
	(0.206)	(0.210)	(0.168)	(0.207)	(0.201)
Polygenic Scores
Educational Attainment PGS	0.011	0.071	-0.036	0.010	0.019
	(0.030)	(0.047)	(0.039)	(0.030)	(0.026)
Well-being PGS	0.098***	-0.019	0.174**	-0.002	-0.070**
	(0.029)	(0.068)	(0.063)	(0.066)	(0.026)
Depressive Symptoms PGS	-0.066*	-0.074	-0.065+	-0.067*	0.100***
	(0.029)	(0.047)	(0.037)	(0.029)	(0.026)
BMI PGS	-0.210***	-0.249***	-0.186***	-0.210***	0.034
	(0.030)	(0.049)	(0.039)	(0.030)	(0.027)
Female	0.076			0.072	0.266***
	(0.088)			(0.088)	(0.080)
Partnership Trajectory (Ref. = Married in the 20s) × Female
Never Married × Female	0.067			0.091	-0.203
	(0.236)			(0.238)	(0.204)
Married Late × Female	-0.201			-0.154	-0.117
	(0.242)			(0.243)	(0.216)
Married and Divorced × Female	-0.302			-0.280	-0.194
	(0.281)			(0.281)	(0.248)
Married Early and Continuously × Female	0.051			0.056	0.186
	(0.124)			(0.124)	(0.115)
Married and Remarried × Female	0.227			0.221	0.553*
	(0.264)			(0.265)	(0.243)
Well-being PGS × Female				0.162+
				(0.088)
Partnership Trajectory (Ref. = Married in the 20s) × Well-being PGS
Never Married × Well-being PGS		0.130	0.237	0.137
		(0.168)	(0.173)	(0.166)
Married Late × Well-being PGS		0.002	-0.349*	-0.003
		(0.170)	(0.170)	(0.169)
Married and Divorced × Well-being PGS		0.408*	-0.450*	0.405*
		(0.195)	(0.175)	(0.193)
Married Early and Continuously × Well-being PGS		0.078	-0.052	0.068
		(0.101)	(0.077)	(0.100)
Married and Remarried × Well-being PGS		0.023	0.146	0.014
		(0.200)	(0.167)	(0.200)
Partnership Trajectory (Ref. = Married in the 20s) × Female
Never Married × Well-being PGS × Female				0.098
				(0.239)
Married Late × Well-being PGS × Female				-0.338
				(0.239)
Married and Divorced × Well-being PGS × Female				-0.849**
				(0.261)
Married Early and Continuously × Well-being PGS × Female				-0.105
				(0.126)
Married and Remarried × Well-being PGS × Female				0.136
				(0.260)
Socioeconomic Status
Years of Education	0.153***	0.164***	0.148***	0.154***	-0.081***
	(0.014)	(0.021)	(0.018)	(0.014)	(0.012)
Mother's Education	0.048***	0.057**	0.046**	0.048***	-0.020+
	(0.012)	(0.020)	(0.015)	(0.012)	(0.011)
Father's Education	0.009	0.010	0.009	0.010	0.002
	(0.010)	(0.016)	(0.013)	(0.010)	(0.009)
Childhood SES (Ref. = Poor)
Average	0.203**	0.202+	0.196*	0.204**	-0.189**
	(0.067)	(0.107)	(0.088)	(0.067)	(0.059)
Well Off	0.189+	0.056	0.281+	0.196+	-0.036
	(0.114)	(0.182)	(0.147)	(0.114)	(0.099)
Varied or Missing	0.283	0.548	0.087	0.270	-0.357
	(0.232)	(0.389)	(0.296)	(0.234)	(0.223)
Birth Year	-0.041***	-0.037**	-0.044***	-0.040***	0.015*
	(0.008)	(0.014)	(0.010)	(0.008)	(0.007)
Birth Cohort (Ref. = Cohorts 0-3; <1924 to 1947)
Cohorts 4 & 5: 1948 to 1959	-0.291**	-0.266	-0.310**	-0.297**	0.345***
	(0.096)	(0.172)	(0.118)	(0.096)	(0.086)
Cohorts 6 & 7: 1960 to 1971	-0.342*	-0.351	-0.327+	-0.360*	0.369**
	(0.161)	(0.286)	(0.197)	(0.161)	(0.143)
Age Outcome was Measured	-0.054***	-0.049***	-0.057***	-0.053***	0.010
	(0.008)	(0.013)	(0.010)	(0.008)	(0.008)
Population Stratification
PC1_5A	-2.996	-1.582	-4.436	-2.923	-1.046
	(3.112)	(4.744)	(4.211)	(3.116)	(2.655)
PC1_5B	-5.141+	-1.606	-7.766*	-5.055+	1.469
	(2.940)	(4.641)	(3.828)	(2.951)	(2.701)
PC1_5C	-3.093	-5.402	-1.845	-3.376	-0.596
	(3.375)	(5.500)	(4.314)	(3.381)	(3.017)
PC1_5D	2.615	9.631*	-3.131	2.216	0.852
	(2.881)	(4.578)	(3.756)	(2.886)	(2.707)
PC1_5E	-4.595	-4.496	-3.313	-4.457	-7.507**
	(3.065)	(4.629)	(4.209)	(3.077)	(2.582)
PC6_10A	3.669	2.296	4.674	3.666	-3.384
	(2.924)	(4.704)	(3.754)	(2.927)	(2.614)
PC6_10B	1.588	2.970	0.787	1.358	-1.071
	(2.917)	(4.579)	(3.814)	(2.920)	(2.645)
PC6_10C	-1.023	2.671	-2.920	-0.966	-2.535
	(2.937)	(4.724)	(3.784)	(2.940)	(2.599)
PC6_10D	-1.254	9.012*	-7.713*	-1.197	-3.273
	(2.877)	(4.555)	(3.750)	(2.880)	(2.586)
PC6_10E	0.728	3.700	-0.941	0.869	-2.716
	(2.897)	(4.491)	(3.828)	(2.900)	(2.629)
/cut1	-80.904***	-72.448**	-87.747***	-79.393***
	(15.131)	(27.241)	(18.499)	(15.166)
/cut2	-79.301***	-70.906**	-86.097***	-77.787***
	(15.130)	(27.239)	(18.498)	(15.165)
/cut3	-77.622***	-69.116*	-84.473***	-76.102***
	(15.128)	(27.236)	(18.496)	(15.164)
/cut4	-75.930***	-67.438*	-82.752***	-74.406***
	(15.127)	(27.235)	(18.493)	(15.162)
/lnalpha					0.447***
					(0.044)
Constant					-27.610+
					(14.191)
Observations	4,899	1,962	2,937	4,899	4,899
Pseudo R-squared	0.0409	0.0518	0.0398	0.0425	0.0224
(-2)Log-likelihood	12748	5036	7658	12726	12946
Chi-squared	543.7	275.3	317.6	564.9	296.5
Standard errors in parentheses
*** p<0.001, ** p<0.01, * p<0.05, + p<0.1

## Sheet: Tab S6. Cog multi logit cluster
Table S6. Substituting the educational attainment polygenic score with the general cognition polygenic score in multinomial logistic models predicting partnership trajectory clusters among non-Hispanic White respondents (reference = married in 20s and continuously married)
	Model 1 (Ref. = Married in 20s and Continuously Married)					Model 1 (Ref. = Married in 20s and Continuously Married)					Model 1 (Ref. = Married in 20s and Continuously Married)					Model 2 (Ref. = Married in 20s and Continuously Married)					Model 2 (Ref. = Married in 20s and Continuously Married)					Model 2 (Ref. = Married in 20s and Continuously Married)					Model 3 (Ref. = Married in 20s and Continuously Married)					Model 3 (Ref. = Married in 20s and Continuously Married)					Model 3 (Ref. = Married in 20s and Continuously Married)
	All					Male					Female					All					Male					Female					All					Male					Female
	Never Married	Married Late	Married & Divorced	Married Early & Continuously	Married & Remarried	Never Married	Married Late	Married & Divorced	Married Early & Continuously	Married & Remarried	Never Married	Married Late	Married & Divorced	Married Early & Continuously	Married & Remarried	Never Married	Married Late	Married & Divorced	Married Early & Continuously	Married & Remarried	Never Married	Married Late	Married & Divorced	Married Early & Continuously	Married & Remarried	Never Married	Married Late	Married & Divorced	Married Early & Continuously	Married & Remarried	Never Married	Married Late	Married & Divorced	Married Early & Continuously	Married & Remarried	Never Married	Married Late	Married & Divorced	Married Early & Continuously	Married & Remarried	Never Married	Married Late	Married & Divorced	Married Early & Continuously	Married & Remarried
VARIABLES	Coef (S.E.)	Coef (S.E.)	Coef (S.E.)	Coef (S.E.)	Coef (S.E.)	Coef (S.E.)	Coef (S.E.)	Coef (S.E.)	Coef (S.E.)	Coef (S.E.)	Coef (S.E.)	Coef (S.E.)	Coef (S.E.)	Coef (S.E.)	Coef (S.E.)	Coef (S.E.)	Coef (S.E.)	Coef (S.E.)	Coef (S.E.)	Coef (S.E.)	Coef (S.E.)	Coef (S.E.)	Coef (S.E.)	Coef (S.E.)	Coef (S.E.)	Coef (S.E.)	Coef (S.E.)	Coef (S.E.)	Coef (S.E.)	Coef (S.E.)	Coef (S.E.)	Coef (S.E.)	Coef (S.E.)	Coef (S.E.)	Coef (S.E.)	Coef (S.E.)	Coef (S.E.)	Coef (S.E.)	Coef (S.E.)	Coef (S.E.)	Coef (S.E.)	Coef (S.E.)	Coef (S.E.)	Coef (S.E.)	Coef (S.E.)
Polygenic Scores
General Cognition PGS	-0.064	0.024	-0.100	-0.192***	-0.198*	-0.096	0.122	0.063	-0.077	-0.170	-0.040	-0.097	-0.267*	-0.259***	-0.229*																-0.030	0.049	-0.022	-0.083*	-0.095	-0.064	0.121	0.119	0.033	-0.086	-0.012	-0.053	-0.173	-0.157**	-0.122
	(0.072)	(0.073)	(0.087)	(0.036)	(0.077)	(0.106)	(0.100)	(0.127)	(0.059)	(0.125)	(0.099)	(0.109)	(0.122)	(0.048)	(0.099)																(0.074)	(0.076)	(0.090)	(0.039)	(0.080)	(0.110)	(0.104)	(0.131)	(0.062)	(0.129)	(0.102)	(0.113)	(0.126)	(0.051)	(0.102)
Well-being PGS	-0.136+	-0.041	0.065	0.025	0.023	-0.236*	-0.173+	0.046	0.006	0.116	-0.053	0.095	0.065	0.060	-0.003																-0.126+	-0.041	0.092	0.044	0.032	-0.249*	-0.189+	0.048	0.008	0.122	-0.040	0.110	0.104	0.076	0.008
	(0.071)	(0.072)	(0.086)	(0.036)	(0.077)	(0.107)	(0.101)	(0.125)	(0.060)	(0.127)	(0.096)	(0.106)	(0.120)	(0.047)	(0.097)																(0.072)	(0.073)	(0.087)	(0.038)	(0.078)	(0.109)	(0.103)	(0.128)	(0.061)	(0.129)	(0.097)	(0.107)	(0.122)	(0.049)	(0.098)
Depressive Symptoms PGS	-0.054	0.002	0.156+	0.082*	-0.035	-0.015	-0.050	0.209+	0.154**	0.053	-0.088	0.057	0.107	0.037	-0.098																-0.064	-0.011	0.137	0.069+	-0.053	-0.029	-0.063	0.177	0.146*	0.053	-0.095	0.043	0.104	0.027	-0.112
	(0.070)	(0.072)	(0.085)	(0.035)	(0.076)	(0.106)	(0.100)	(0.126)	(0.059)	(0.126)	(0.094)	(0.105)	(0.118)	(0.046)	(0.096)																(0.070)	(0.072)	(0.087)	(0.037)	(0.076)	(0.106)	(0.100)	(0.127)	(0.062)	(0.128)	(0.094)	(0.105)	(0.122)	(0.048)	(0.097)
BMI PGS	-0.022	-0.119	0.017	0.035	0.090	0.022	-0.224*	0.182	0.147*	0.177	-0.077	0.016	-0.128	-0.036	0.035																-0.043	-0.131+	-0.013	0.006	0.056	-0.026	-0.259*	0.135	0.137*	0.155	-0.085	0.004	-0.156	-0.065	0.009
	(0.072)	(0.073)	(0.087)	(0.036)	(0.078)	(0.107)	(0.102)	(0.129)	(0.061)	(0.131)	(0.098)	(0.108)	(0.121)	(0.047)	(0.099)																(0.073)	(0.074)	(0.088)	(0.038)	(0.079)	(0.110)	(0.104)	(0.131)	(0.063)	(0.135)	(0.099)	(0.109)	(0.123)	(0.050)	(0.100)
Socioeconomic Status
Years of Education																-0.032	-0.028	-0.109**	-0.232***	-0.191***	-0.050	0.003	-0.090	-0.180***	-0.137*	-0.003	-0.057	-0.128*	-0.271***	-0.237***	-0.033	-0.039	-0.105**	-0.223***	-0.174***	-0.044	-0.017	-0.087	-0.169***	-0.115*	-0.007	-0.054	-0.119*	-0.263***	-0.225***
																(0.033)	(0.033)	(0.039)	(0.017)	(0.035)	(0.047)	(0.045)	(0.055)	(0.025)	(0.054)	(0.046)	(0.051)	(0.057)	(0.023)	(0.047)	(0.034)	(0.034)	(0.041)	(0.017)	(0.036)	(0.049)	(0.047)	(0.057)	(0.026)	(0.056)	(0.048)	(0.052)	(0.059)	(0.024)	(0.048)
Mother's Education																-0.019	-0.006	-0.050	0.001	-0.001	-0.025	-0.001	-0.029	0.005	-0.050	-0.019	-0.010	-0.067	0.002	0.029	-0.012	-0.004	-0.066+	-0.006	-0.000	-0.016	0.004	-0.055	-0.006	-0.038	-0.016	-0.012	-0.080	-0.005	0.023
																(0.030)	(0.030)	(0.036)	(0.015)	(0.033)	(0.046)	(0.043)	(0.053)	(0.024)	(0.054)	(0.040)	(0.044)	(0.050)	(0.020)	(0.041)	(0.030)	(0.031)	(0.037)	(0.015)	(0.033)	(0.046)	(0.043)	(0.056)	(0.025)	(0.055)	(0.040)	(0.044)	(0.051)	(0.020)	(0.042)
Father's Education																0.020	0.034	0.023	-0.011	0.007	0.040	0.055	0.056	-0.046*	-0.001	0.007	0.009	0.001	0.009	0.017	0.020	0.030	0.022	-0.009	0.011	0.044	0.059	0.053	-0.045*	-0.002	0.008	0.006	0.001	0.012	0.022
																(0.025)	(0.026)	(0.031)	(0.013)	(0.027)	(0.039)	(0.036)	(0.046)	(0.020)	(0.046)	(0.034)	(0.037)	(0.041)	(0.017)	(0.034)	(0.025)	(0.026)	(0.031)	(0.013)	(0.028)	(0.039)	(0.037)	(0.047)	(0.021)	(0.046)	(0.034)	(0.037)	(0.042)	(0.017)	(0.035)
Childhood SES (Ref. = Poor)
Average																-0.206	-0.090	-0.455*	-0.034	0.042	-0.129	-0.019	-0.572*	-0.015	0.450	-0.304	-0.203	-0.345	-0.069	-0.201	-0.205	-0.105	-0.424*	-0.008	0.052	-0.157	-0.080	-0.512+	0.031	0.459	-0.319	-0.228	-0.351	-0.057	-0.171
																(0.167)	(0.175)	(0.195)	(0.086)	(0.188)	(0.254)	(0.244)	(0.269)	(0.133)	(0.337)	(0.222)	(0.251)	(0.287)	(0.116)	(0.231)	(0.167)	(0.176)	(0.197)	(0.087)	(0.189)	(0.256)	(0.248)	(0.273)	(0.135)	(0.340)	(0.224)	(0.253)	(0.290)	(0.117)	(0.233)
Well Off																-0.183	-0.190	-0.006	-0.223	0.061	-0.044	-0.206	-0.919+	-0.240	0.361	-0.366	-0.236	0.587	-0.206	-0.082	-0.186	-0.211	0.001	-0.195	0.136	-0.095	-0.288	-0.849+	-0.162	0.389	-0.375	-0.305	0.491	-0.217	-0.004
																(0.260)	(0.273)	(0.294)	(0.147)	(0.294)	(0.387)	(0.380)	(0.509)	(0.249)	(0.513)	(0.355)	(0.395)	(0.382)	(0.186)	(0.363)	(0.262)	(0.276)	(0.297)	(0.148)	(0.295)	(0.393)	(0.387)	(0.515)	(0.251)	(0.516)	(0.358)	(0.400)	(0.391)	(0.189)	(0.367)
Varied or Missing																-0.285	0.350	-0.344	0.096	-0.317	0.407	0.580	-0.284	-0.049	-12.193	-0.944	0.038	-0.373	0.118	-0.186	-0.269	0.392	-0.328	0.142	-0.300	0.480	0.664	-0.396	-0.053	-11.605	-0.986	0.039	-0.423	0.195	-0.109
																(0.636)	(0.522)	(0.765)	(0.301)	(0.765)	(0.815)	(0.696)	(1.078)	(0.499)	(610.725)	(1.065)	(0.804)	(1.088)	(0.390)	(0.802)	(0.637)	(0.524)	(0.769)	(0.300)	(0.765)	(0.819)	(0.706)	(1.087)	(0.504)	(452.815)	(1.068)	(0.810)	(1.101)	(0.393)	(0.805)
Female																0.104	-0.243+	-0.013	0.889***	0.460**											0.115	-0.237+	-0.002	0.902***	0.459**
																(0.130)	(0.132)	(0.158)	(0.070)	(0.144)											(0.130)	(0.133)	(0.159)	(0.070)	(0.145)
Birth Year																0.063***	0.055***	0.093***	0.005	0.068***	0.092***	0.057**	0.101***	0.011	0.083**	0.049***	0.056***	0.104***	0.001	0.061***	0.063***	0.057***	0.094***	0.004	0.067***	0.094***	0.063**	0.105***	0.010	0.079**	0.050***	0.057***	0.104***	0.000	0.059***
																(0.012)	(0.013)	(0.014)	(0.007)	(0.013)	(0.021)	(0.022)	(0.023)	(0.013)	(0.028)	(0.015)	(0.016)	(0.019)	(0.009)	(0.015)	(0.012)	(0.013)	(0.014)	(0.007)	(0.013)	(0.022)	(0.022)	(0.023)	(0.013)	(0.028)	(0.015)	(0.016)	(0.019)	(0.009)	(0.015)
Birth Cohort (Ref. = Cohorts 0-3; <1924 to 1947)
Cohorts 4 & 5: 1948 to 1959																-0.328	-0.400+	0.364	-0.070	0.224	-0.309	-0.399	-0.323	-0.050	0.543	-0.482+	-0.437	1.086**	-0.104	0.034	-0.367+	-0.422*	0.390	-0.047	0.233	-0.352	-0.450	-0.364	-0.037	0.598	-0.546*	-0.450	1.127**	-0.081	0.053
																(0.205)	(0.213)	(0.239)	(0.115)	(0.221)	(0.338)	(0.338)	(0.365)	(0.195)	(0.441)	(0.266)	(0.283)	(0.371)	(0.146)	(0.263)	(0.207)	(0.214)	(0.240)	(0.116)	(0.222)	(0.341)	(0.346)	(0.372)	(0.197)	(0.449)	(0.269)	(0.286)	(0.375)	(0.147)	(0.264)
Cohorts 6 & 7: 1960 to 1971																-0.340	-0.360	-0.539+	-0.706***	-0.234	-0.369	-0.110	-0.921+	-0.682*	0.207	-0.523	-0.651+	-0.223	-0.773***	-0.507	-0.385	-0.398	-0.521	-0.686***	-0.229	-0.451	-0.194	-0.938+	-0.649*	0.294	-0.572	-0.671+	-0.205	-0.757***	-0.482
																(0.286)	(0.300)	(0.325)	(0.182)	(0.313)	(0.481)	(0.498)	(0.524)	(0.317)	(0.634)	(0.364)	(0.384)	(0.452)	(0.225)	(0.368)	(0.287)	(0.302)	(0.327)	(0.183)	(0.314)	(0.488)	(0.511)	(0.538)	(0.319)	(0.646)	(0.366)	(0.388)	(0.459)	(0.227)	(0.369)
Population Stratification
PC1_5A	0.297	-4.533	15.396	0.531	-28.118*	-1.210	-9.684	19.067	-3.562	-45.702*	2.128	2.874	17.408	5.858	-13.965																0.472	-5.023	19.518*	8.241*	-25.975*	-2.060	-12.141	23.389	1.823	-43.514*	2.015	4.928	20.540	13.386*	-12.014
	(7.041)	(6.486)	(9.491)	(3.854)	(12.024)	(10.089)	(9.198)	(15.913)	(6.637)	(20.941)	(9.944)	(9.297)	(12.051)	(5.082)	(15.230)																(7.303)	(6.716)	(9.865)	(4.070)	(12.422)	(10.529)	(9.538)	(16.475)	(6.803)	(21.343)	(10.359)	(9.678)	(12.654)	(5.314)	(15.783)
PC1_5B	-8.472	10.347	7.513	5.164	6.592	-3.245	7.754	-1.003	5.419	6.026	-14.239	14.593	14.240	4.178	6.494																-8.156	10.780	10.424	3.573	7.710	-2.040	7.645	2.222	5.043	10.584	-14.636	14.937	17.503	1.928	5.251
	(6.366)	(7.690)	(9.175)	(3.699)	(8.208)	(9.214)	(9.862)	(12.641)	(6.114)	(13.451)	(8.861)	(12.393)	(13.559)	(4.901)	(10.459)																(6.513)	(7.866)	(9.415)	(3.905)	(8.500)	(9.589)	(10.180)	(13.070)	(6.212)	(14.051)	(9.088)	(12.687)	(13.959)	(5.138)	(10.789)
PC1_5C	3.153	-5.414	-3.364	7.126+	14.590	-2.579	-12.811	0.968	4.496	27.598+	7.669	1.329	-7.048	10.894*	10.653																3.130	-5.264	-2.691	6.952	14.416	-2.350	-12.729	1.323	2.618	28.051+	7.490	1.620	-10.069	9.797+	9.054
	(8.271)	(8.439)	(10.060)	(4.173)	(8.960)	(12.410)	(11.718)	(14.785)	(7.002)	(15.137)	(11.279)	(12.365)	(13.844)	(5.450)	(11.298)																(8.363)	(8.515)	(10.191)	(4.413)	(9.075)	(12.684)	(11.918)	(15.135)	(7.238)	(15.627)	(11.348)	(12.364)	(13.982)	(5.675)	(11.358)
PC1_5D	-9.430	-20.076**	-4.946	8.402*	9.049	-19.471*	-23.302*	1.555	13.861*	6.729	0.641	-14.847	-8.177	6.269	10.351																-9.220	-19.561**	-4.930	6.407+	9.505	-19.778+	-23.897*	-0.311	10.312+	7.643	0.225	-14.940	-6.081	6.502	12.272
	(7.029)	(6.979)	(8.349)	(3.573)	(7.851)	(9.920)	(9.312)	(11.872)	(5.831)	(13.033)	(9.959)	(10.683)	(11.859)	(4.755)	(9.983)																(7.141)	(7.083)	(8.596)	(3.766)	(8.075)	(10.276)	(9.559)	(12.263)	(5.997)	(13.367)	(10.085)	(10.894)	(12.163)	(4.959)	(10.301)
PC1_5E	4.045	-6.024	14.009	19.419***	25.182*	5.403	0.574	27.672+	23.223***	18.399	0.765	-12.534	3.181	15.994**	29.350+																3.185	-7.253	12.724	14.048***	23.070+	4.318	-0.659	26.746+	19.138**	16.252	-0.656	-15.273	4.032	9.636+	26.671
	(6.850)	(6.284)	(9.097)	(3.777)	(12.153)	(9.735)	(8.848)	(15.154)	(6.505)	(20.758)	(9.776)	(9.076)	(11.625)	(5.011)	(15.671)																(7.075)	(6.468)	(9.452)	(3.981)	(12.617)	(10.131)	(9.173)	(15.815)	(6.634)	(21.125)	(10.123)	(9.377)	(12.271)	(5.234)	(16.333)
PC6_10A	-6.164	-2.130	10.595	1.452	-1.178	-8.853	0.585	13.763	3.878	-2.921	-4.144	-5.813	10.858	1.888	0.783																-5.376	-1.621	13.658	3.537	1.662	-5.227	2.567	18.948	4.993	1.635	-4.507	-6.322	11.388	2.591	1.404
	(7.127)	(7.302)	(8.647)	(3.594)	(7.721)	(10.737)	(10.211)	(12.750)	(5.962)	(12.732)	(9.660)	(10.714)	(11.969)	(4.714)	(9.782)																(7.248)	(7.431)	(8.894)	(3.790)	(7.873)	(11.047)	(10.461)	(13.063)	(6.120)	(13.184)	(9.783)	(10.867)	(12.447)	(4.907)	(9.931)
PC6_10B	-12.506+	-9.225	-2.177	-6.043+	-4.480	3.452	-5.637	1.737	-2.875	-4.403	-27.182**	-11.797	-6.752	-10.377*	-6.082																-13.150+	-9.397	-1.651	-7.378+	-4.973	5.992	-4.758	3.698	-5.136	-1.176	-28.959**	-12.371	-5.178	-8.506+	-4.743
	(7.092)	(7.188)	(8.669)	(3.582)	(7.656)	(10.318)	(9.639)	(12.422)	(5.824)	(12.301)	(9.800)	(10.787)	(12.152)	(4.788)	(9.937)																(7.261)	(7.335)	(8.893)	(3.769)	(7.881)	(10.723)	(9.973)	(12.708)	(5.977)	(12.791)	(9.997)	(11.009)	(12.663)	(4.974)	(10.203)
PC6_10C	-3.490	11.220	8.776	4.974	6.525	2.688	13.063	17.472	2.476	-6.620	-7.814	9.876	1.363	7.041	13.671																-3.181	11.612	9.249	6.560+	6.628	5.294	15.715	18.937	1.700	-6.611	-8.895	9.381	1.108	9.221+	13.325
	(7.137)	(7.298)	(8.794)	(3.610)	(7.727)	(10.544)	(9.978)	(13.148)	(5.969)	(12.771)	(9.740)	(10.855)	(12.014)	(4.774)	(9.848)																(7.269)	(7.415)	(8.986)	(3.807)	(7.838)	(10.843)	(10.208)	(13.411)	(6.119)	(13.004)	(9.934)	(11.063)	(12.313)	(4.977)	(9.996)
PC6_10D	0.032	13.254+	-9.674	-1.798	12.124	-4.333	19.583*	3.376	0.825	16.901	3.059	5.678	-21.478+	-5.505	6.405																-0.239	13.287+	-10.206	-1.622	11.442	-4.105	21.555*	2.431	1.430	19.047	2.459	5.066	-19.926	-3.764	6.072
	(7.021)	(7.159)	(8.549)	(3.547)	(7.590)	(10.270)	(9.684)	(12.209)	(5.761)	(12.269)	(9.722)	(10.725)	(12.028)	(4.727)	(9.765)																(7.111)	(7.228)	(8.669)	(3.738)	(7.732)	(10.594)	(9.933)	(12.438)	(5.882)	(12.664)	(9.788)	(10.800)	(12.240)	(4.934)	(9.932)
PC6_10E	4.165	-2.098	-9.280	-3.022	-11.312	-1.120	1.691	-25.595*	-3.089	-8.638	9.415	-6.487	10.672	-1.502	-11.366																4.640	-1.159	-6.986	1.437	-8.162	-1.356	1.935	-24.658*	-0.013	-8.062	10.361	-4.933	14.089	3.300	-6.683
	(7.688)	(7.563)	(9.045)	(3.808)	(7.971)	(11.114)	(10.153)	(12.224)	(6.176)	(13.034)	(10.680)	(11.352)	(13.577)	(5.082)	(10.241)																(7.747)	(7.603)	(9.213)	(4.031)	(8.120)	(11.358)	(10.351)	(12.568)	(6.362)	(13.402)	(10.743)	(11.433)	(13.915)	(5.318)	(10.437)
Constant	-1.849***	-1.915***	-2.277***	0.220***	-2.030***	-1.945***	-1.893***	-2.391***	-0.359***	-2.386***	-1.779***	-1.980***	-2.247***	0.597***	-1.781***	-123.313***	-108.609***	-180.945***	-6.030	-132.462***	-180.176***	-113.527**	-196.667***	-19.584	-161.922**	-96.596***	-109.044***	-202.276***	1.782	-116.590***	-123.933***	-112.532***	-182.727***	-4.586	-131.361***	-184.514***	-124.226**	-205.178***	-17.397	-155.428**	-99.072***	-111.156***	-201.711***	3.749	-114.467***
	(0.066)	(0.069)	(0.080)	(0.033)	(0.074)	(0.098)	(0.099)	(0.123)	(0.054)	(0.125)	(0.093)	(0.100)	(0.114)	(0.043)	(0.094)	(23.315)	(24.538)	(26.328)	(13.663)	(25.302)	(41.352)	(42.315)	(44.015)	(24.325)	(53.829)	(28.592)	(30.059)	(36.882)	(16.795)	(28.833)	(23.427)	(24.686)	(26.515)	(13.744)	(25.472)	(42.006)	(43.478)	(45.343)	(24.477)	(54.822)	(28.694)	(30.407)	(37.417)	(16.923)	(28.942)
Observations	4,922					1,965					2,957					4,922					1,965					2,957					4,922					1,965					2,957
Pseudo R-squared	0.0127					0.0225					0.0151					0.0726					0.0581					0.0622					0.0817					0.0775					0.0744
(-2)Log-likelihood	12862					5290					7262					12082					5098					6916					11964					4994					6826
Chi-squared	165.6					122.0					111.3					946.1					314.2					458.7					1064					419.5					548.7
Standard errors in parentheses
*** p<0.001, ** p<0.01, * p<0.05, + p<0.1

## Sheet: Tab S7. Cog ordered logit SRH
Table S7. Substituting the educational attainment polygenic score with the general cognition polygenic score in ordered logit models predicting self‑rated health among non‑Hispanic White respondents
	Model 1			Model 2			Model 3
	PGS			Cluster + PGS			Cluster + PGS + SES
	All	Male	Female	All	Male	Female	All	Male	Female
VARIABLES	Coef (S.E.)	Coef (S.E.)	Coef (S.E.)	Coef (S.E.)	Coef (S.E.)	Coef (S.E.)	Coef (S.E.)	Coef (S.E.)	Coef (S.E.)
Partnership Trajectory (Ref. = Married in the 20s)
Never Married				-0.399***	-0.514**	-0.305+	-0.260*	-0.318+	-0.236
				(0.118)	(0.170)	(0.164)	(0.118)	(0.173)	(0.164)
Married Late				0.021	0.035	-0.052	0.155	0.195	0.035
				(0.119)	(0.161)	(0.177)	(0.121)	(0.166)	(0.179)
Married and Divorced				-0.448**	-0.302	-0.589**	-0.231	-0.072	-0.393*
				(0.141)	(0.204)	(0.196)	(0.142)	(0.205)	(0.198)
Married Early and Continuously				-0.073	-0.146	-0.050	0.005	-0.009	-0.005
				(0.059)	(0.097)	(0.077)	(0.063)	(0.100)	(0.082)
Married and Remarried				-0.141	-0.328	-0.020	0.103	-0.038	0.180
				(0.128)	(0.203)	(0.165)	(0.130)	(0.208)	(0.168)
Polygenic Scores
General Cognition PGS	0.136***	0.197***	0.094*	0.133***	0.192***	0.091*	0.043	0.101*	0.001
	(0.029)	(0.047)	(0.038)	(0.029)	(0.047)	(0.038)	(0.030)	(0.048)	(0.039)
Well-being PGS	0.110***	0.052	0.145***	0.108***	0.048	0.144***	0.097***	0.037	0.130***
	(0.029)	(0.047)	(0.037)	(0.029)	(0.047)	(0.037)	(0.029)	(0.047)	(0.037)
Depressive Symptoms PGS	-0.065*	-0.068	-0.067+	-0.065*	-0.063	-0.067+	-0.063*	-0.074	-0.059
	(0.028)	(0.046)	(0.036)	(0.028)	(0.046)	(0.036)	(0.029)	(0.047)	(0.037)
BMI PGS	-0.219***	-0.276***	-0.179***	-0.217***	-0.271***	-0.180***	-0.210***	-0.254***	-0.177***
	(0.029)	(0.047)	(0.038)	(0.029)	(0.047)	(0.038)	(0.030)	(0.048)	(0.038)
Socioeconomic Status
Years of Education							0.151***	0.165***	0.144***
							(0.014)	(0.021)	(0.018)
Mother's Education							0.048***	0.058**	0.047**
							(0.012)	(0.020)	(0.015)
Father's Education							0.009	0.009	0.007
							(0.010)	(0.016)	(0.013)
Childhood SES (Ref. = Poor)
Average							0.205**	0.211*	0.190*
							(0.067)	(0.107)	(0.087)
Well Off							0.186	0.055	0.264+
							(0.114)	(0.182)	(0.147)
Varied or Missing							0.295	0.592	0.100
							(0.232)	(0.388)	(0.294)
Female							0.088
							(0.055)
Birth Year							-0.041***	-0.038**	-0.044***
							(0.008)	(0.014)	(0.010)
Birth Cohort (Ref. = Cohorts 0-3; <1924 to 1947)
Cohorts 4 & 5: 1948 to 1959							-0.295**	-0.257	-0.305**
							(0.096)	(0.172)	(0.118)
Cohorts 6 & 7: 1960 to 1971							-0.343*	-0.318	-0.319
							(0.161)	(0.285)	(0.197)
Age Outcome was Measured							-0.053***	-0.049***	-0.057***
							(0.008)	(0.013)	(0.010)
Population Stratification
PC1_5A	1.446	2.806	0.281	1.656	2.520	0.676	-3.374	-2.682	-4.688
	(3.049)	(4.638)	(4.108)	(3.053)	(4.652)	(4.119)	(3.124)	(4.767)	(4.227)
PC1_5B	-4.084	-1.007	-6.202+	-4.288	-1.128	-6.261+	-5.632+	-2.456	-7.830*
	(2.899)	(4.555)	(3.767)	(2.904)	(4.571)	(3.776)	(2.953)	(4.644)	(3.839)
PC1_5C	-5.662+	-9.297+	-3.018	-5.476	-8.865	-3.044	-3.734	-6.486	-1.518
	(3.369)	(5.452)	(4.297)	(3.373)	(5.468)	(4.302)	(3.406)	(5.549)	(4.344)
PC1_5D	2.134	7.758+	-1.833	1.870	7.737+	-2.197	2.326	9.489*	-2.575
	(2.840)	(4.460)	(3.706)	(2.851)	(4.491)	(3.714)	(2.887)	(4.583)	(3.752)
PC1_5E	-7.292*	-8.075+	-5.242	-7.036*	-7.472+	-5.493	-4.819	-5.363	-3.189
	(2.987)	(4.489)	(4.078)	(2.998)	(4.503)	(4.099)	(3.064)	(4.615)	(4.197)
PC6_10A	4.807+	5.300	4.888	4.859+	5.253	5.047	3.684	2.515	4.633
	(2.891)	(4.639)	(3.708)	(2.893)	(4.643)	(3.712)	(2.923)	(4.698)	(3.747)
PC6_10B	1.787	3.619	1.094	1.606	3.708	0.746	1.587	3.369	1.167
	(2.881)	(4.509)	(3.761)	(2.882)	(4.511)	(3.766)	(2.914)	(4.579)	(3.811)
PC6_10C	-0.890	2.387	-2.578	-0.867	2.404	-2.653	-1.225	1.999	-3.076
	(2.903)	(4.664)	(3.730)	(2.904)	(4.667)	(3.735)	(2.931)	(4.723)	(3.772)
PC6_10D	-0.886	8.791+	-7.437*	-1.041	8.981*	-7.821*	-1.054	9.102*	-7.659*
	(2.846)	(4.493)	(3.701)	(2.850)	(4.507)	(3.708)	(2.877)	(4.556)	(3.752)
PC6_10E	4.815	8.338+	2.325	4.750	8.036+	2.648	2.089	7.206	-0.975
	(3.051)	(4.753)	(3.995)	(3.054)	(4.762)	(3.999)	(3.081)	(4.829)	(4.041)
/cut1	-3.766***	-3.751***	-3.786***	-3.850***	-3.871***	-3.856***	-80.642***	-74.787**	-87.384***
	(0.095)	(0.150)	(0.124)	(0.102)	(0.158)	(0.135)	(15.136)	(27.108)	(18.516)
/cut2	-2.198***	-2.252***	-2.172***	-2.281***	-2.369***	-2.241***	-79.039***	-73.247**	-85.738***
	(0.048)	(0.077)	(0.061)	(0.060)	(0.091)	(0.080)	(15.135)	(27.106)	(18.515)
/cut3	-0.595***	-0.553***	-0.624***	-0.674***	-0.664***	-0.689***	-77.360***	-71.458**	-84.120***
	(0.030)	(0.048)	(0.039)	(0.046)	(0.067)	(0.065)	(15.134)	(27.104)	(18.513)
/cut4	0.999***	1.017***	0.996***	0.925***	0.914***	0.935***	-75.669***	-69.782*	-82.405***
	(0.032)	(0.052)	(0.042)	(0.047)	(0.069)	(0.066)	(15.132)	(27.102)	(18.510)
Observations	4,899	1,962	2,937	4,899	1,962	2,937	4,899	1,962	2,937
Pseudo R-squared	0.00994	0.0164	0.00853	0.0115	0.0189	0.01000	0.0408	0.0513	0.0379
(-2)Log-likelihood	13158	5224	7908	13138	5212	7896	12748	5040	7674
Chi-squared	132.1	87.14	68.02	152.6	100.2	79.72	542.3	272.6	302.0
Standard errors in parentheses
*** p<0.001, ** p<0.01, * p<0.05, + p<0.1

## Sheet: Tab S8. Cog neg binom CESD
Table S8. Substituting the educational attainment polygenic score with the general cognition polygenic score in negative binomial models predicting CESD score among non‑Hispanic White respondents
	Model 1			Model 2			Model 3
	PGS			Cluster + PGS			Cluster + PGS + SES
	All	Male	Female	All	Male	Female	All	Male	Female
VARIABLES	Coef (S.E.)	Coef (S.E.)	Coef (S.E.)	Coef (S.E.)	Coef (S.E.)	Coef (S.E.)	Coef (S.E.)	Coef (S.E.)	Coef (S.E.)
Partnership Trajectory (Ref. = Married in the 20s)
Never Married				0.331**	0.508**	0.173	0.236*	0.329*	0.143
				(0.104)	(0.156)	(0.139)	(0.103)	(0.157)	(0.137)
Married Late				0.080	0.179	0.006	0.068	0.119	-0.017
				(0.111)	(0.156)	(0.157)	(0.109)	(0.154)	(0.155)
Married and Divorced				0.286*	0.390*	0.211	0.140	0.263	0.060
				(0.127)	(0.189)	(0.171)	(0.125)	(0.187)	(0.169)
Married Early and Continuously				0.076	-0.087	0.034	-0.033	-0.132	0.015
				(0.055)	(0.097)	(0.069)	(0.057)	(0.097)	(0.071)
Married and Remarried				0.232*	-0.195	0.321*	0.032	-0.360+	0.207
				(0.114)	(0.209)	(0.138)	(0.112)	(0.207)	(0.136)
Polygenic Scores
General Cognition PGS	-0.070**	-0.093*	-0.049	-0.069*	-0.095*	-0.049	-0.020	-0.057	0.012
	(0.027)	(0.044)	(0.033)	(0.027)	(0.044)	(0.034)	(0.027)	(0.045)	(0.034)
Well-being PGS	-0.080**	-0.071	-0.083**	-0.079**	-0.061	-0.082*	-0.070**	-0.054	-0.078*
	(0.026)	(0.046)	(0.032)	(0.026)	(0.046)	(0.032)	(0.026)	(0.045)	(0.032)
Depressive Symptoms PGS	0.098***	0.096*	0.095**	0.098***	0.095*	0.097**	0.095***	0.103*	0.089**
	(0.027)	(0.046)	(0.032)	(0.027)	(0.046)	(0.032)	(0.026)	(0.046)	(0.032)
BMI PGS	0.051+	0.069	0.035	0.050+	0.069	0.034	0.028	0.049	0.017
	(0.027)	(0.047)	(0.033)	(0.027)	(0.047)	(0.033)	(0.027)	(0.046)	(0.033)
Socioeconomic Status
Years of Education							-0.078***	-0.059**	-0.092***
							(0.012)	(0.019)	(0.016)
Mother's Education							-0.020+	-0.026	-0.014
							(0.011)	(0.018)	(0.013)
Father's Education							0.003	0.004	0.001
							(0.009)	(0.015)	(0.011)
Childhood SES (Ref. = Poor)
Average							-0.199***	-0.159	-0.212**
							(0.059)	(0.099)	(0.073)
Well Off							-0.045	0.076	-0.098
							(0.099)	(0.168)	(0.123)
Varied or Missing							-0.357	-0.359	-0.378
							(0.223)	(0.402)	(0.268)
Female							0.334***
							(0.051)
Birth Year							0.013+	-0.010	0.025**
							(0.007)	(0.014)	(0.009)
Birth Cohort (Ref. = Cohorts 0-3; <1924 to 1947)
Cohorts 4 & 5: 1948 to 1959							0.349***	0.687***	0.188+
							(0.086)	(0.159)	(0.104)
Cohorts 6 & 7: 1960 to 1971							0.384**	0.897***	0.129
							(0.143)	(0.268)	(0.172)
Age Outcome was Measured							0.010	-0.005	0.017+
							(0.008)	(0.013)	(0.009)
Population Stratification
PC1_5A	-2.049	-1.398	-1.685	-2.078	-2.624	-1.498	-0.307	-1.212	-0.230
	(2.715)	(4.379)	(3.459)	(2.711)	(4.368)	(3.453)	(2.676)	(4.355)	(3.431)
PC1_5B	1.771	-7.689+	7.008*	1.940	-6.889	7.229*	1.476	-5.346	6.366+
	(2.760)	(4.478)	(3.493)	(2.761)	(4.471)	(3.492)	(2.715)	(4.374)	(3.467)
PC1_5C	1.922	-1.601	3.755	1.575	-0.961	3.337	-0.136	-1.865	0.933
	(3.112)	(5.421)	(3.781)	(3.111)	(5.388)	(3.787)	(3.055)	(5.333)	(3.735)
PC1_5D	0.102	1.179	-0.704	0.429	2.705	-0.681	1.011	4.270	0.115
	(2.778)	(4.681)	(3.445)	(2.781)	(4.673)	(3.447)	(2.716)	(4.604)	(3.390)
PC1_5E	-6.398*	-3.161	-8.648*	-6.622*	-2.882	-8.951**	-7.416**	-4.330	-10.251**
	(2.631)	(4.232)	(3.375)	(2.637)	(4.236)	(3.384)	(2.586)	(4.195)	(3.344)
PC6_10A	-3.119	-3.920	-2.192	-3.103	-3.873	-2.190	-3.360	-2.510	-3.872
	(2.664)	(4.595)	(3.243)	(2.663)	(4.575)	(3.245)	(2.614)	(4.496)	(3.204)
PC6_10B	-0.686	-6.335	1.564	-0.678	-6.719	1.237	-0.904	-5.470	1.999
	(2.703)	(4.457)	(3.384)	(2.703)	(4.437)	(3.393)	(2.644)	(4.375)	(3.333)
PC6_10C	-1.845	-2.820	-0.970	-1.869	-3.145	-1.173	-1.939	-3.508	-1.609
	(2.646)	(4.623)	(3.215)	(2.647)	(4.602)	(3.223)	(2.600)	(4.524)	(3.190)
PC6_10D	-2.381	-2.487	-2.078	-2.028	-2.390	-1.941	-3.182	-2.812	-2.897
	(2.641)	(4.480)	(3.265)	(2.640)	(4.451)	(3.268)	(2.590)	(4.379)	(3.229)
PC6_10E	-4.868+	-3.771	-5.287	-4.984+	-4.238	-5.294	-3.416	-3.704	-3.086
	(2.859)	(4.755)	(3.558)	(2.857)	(4.735)	(3.560)	(2.802)	(4.678)	(3.512)
/lnalpha	0.578***	0.647***	0.493***	0.568***	0.612***	0.486***	0.453***	0.499***	0.401***
	(0.042)	(0.074)	(0.052)	(0.042)	(0.075)	(0.053)	(0.044)	(0.078)	(0.054)
Constant	-0.028	-0.251***	0.093**	-0.111**	-0.295***	0.040	-25.009+	19.638	-46.770**
	(0.024)	(0.041)	(0.030)	(0.041)	(0.061)	(0.055)	(14.182)	(26.658)	(17.120)
Observations	4,899	1,962	2,937	4,899	1,962	2,937	4,899	1,962	2,937
Pseudo R-squared	0.00475	0.00658	0.00516	0.00595	0.0109	0.00607	0.0215	0.0256	0.0177
(-2)Log-likelihood	13180	4682	8432	13164	4662	8424	12958	4594	8326
Chi-squared	62.96	31.04	43.71	78.85	51.49	51.49	285.1	120.6	149.8
Standard errors in parentheses
*** p<0.001, ** p<0.01, * p<0.05, + p<0.1

## Sheet: Tab S9. LCA multi logit cluster
Table S9. Multinomial logistic models predicting partnership trajectory clusters based on latent class analysis (LCA) among non‑Hispanic White respondents (reference = married in 20s and continuously married)
	Model 1 (Ref. = Continuously Married)					Model 1 (Ref. = Continuously Married)					Model 1 (Ref. = Continuously Married)					Model 2 (Ref. = Continuously Married)					Model 2 (Ref. = Continuously Married)					Model 2 (Ref. = Continuously Married)					Model 3 (Ref. = Continuously Married)					Model 3 (Ref. = Continuously Married)					Model 3 (Ref. = Continuously Married)
	All					Male					Female					All					Male					Female					All					Male					Female
	Widowed	Never Married	Married Late	Divorced Early and Remarried	Remarried	Widowed	Never Married	Married Late	Divorced Early and Remarried	Remarried	Widowed	Never Married	Married Late	Divorced Early and Remarried	Remarried	Widowed	Never Married	Married Late	Divorced Early and Remarried	Remarried	Widowed	Never Married	Married Late	Divorced Early and Remarried	Remarried	Widowed	Never Married	Married Late	Divorced Early and Remarried	Remarried	Widowed	Never Married	Married Late	Divorced Early and Remarried	Remarried	Widowed	Never Married	Married Late	Divorced Early and Remarried	Remarried	Widowed	Never Married	Married Late	Divorced Early and Remarried	Remarried
VARIABLES	Coef (S.E.)	Coef (S.E.)	Coef (S.E.)	Coef (S.E.)	Coef (S.E.)	Coef (S.E.)	Coef (S.E.)	Coef (S.E.)	Coef (S.E.)	Coef (S.E.)	Coef (S.E.)	Coef (S.E.)	Coef (S.E.)	Coef (S.E.)	Coef (S.E.)	Coef (S.E.)	Coef (S.E.)	Coef (S.E.)	Coef (S.E.)	Coef (S.E.)	Coef (S.E.)	Coef (S.E.)	Coef (S.E.)	Coef (S.E.)	Coef (S.E.)	Coef (S.E.)	Coef (S.E.)	Coef (S.E.)	Coef (S.E.)	Coef (S.E.)	Coef (S.E.)	Coef (S.E.)	Coef (S.E.)	Coef (S.E.)	Coef (S.E.)	Coef (S.E.)	Coef (S.E.)	Coef (S.E.)	Coef (S.E.)	Coef (S.E.)	Coef (S.E.)	Coef (S.E.)	Coef (S.E.)	Coef (S.E.)	Coef (S.E.)
Polygenic Scores
Educational Attainment PGS	-0.057	0.164*	0.256***	-0.025	-0.206**	-0.149	0.166	0.185**	0.077	-0.361***	-0.062	0.168+	0.374***	-0.106	-0.115																-0.004	0.120	0.153***	-0.059	-0.169*	-0.110	0.117	0.080	0.020	-0.374**	0.011	0.105	0.240***	-0.131	-0.059
	(0.136)	(0.070)	(0.042)	(0.068)	(0.065)	(0.361)	(0.105)	(0.058)	(0.101)	(0.108)	(0.149)	(0.095)	(0.062)	(0.093)	(0.081)																(0.142)	(0.074)	(0.045)	(0.072)	(0.068)	(0.382)	(0.112)	(0.062)	(0.108)	(0.117)	(0.155)	(0.101)	(0.067)	(0.098)	(0.085)
Well-being PGS	-0.195	-0.175*	-0.057	-0.022	-0.038	0.290	-0.303**	-0.126*	-0.010	0.092	-0.263+	-0.096	-0.012	-0.041	-0.104																-0.176	-0.178*	-0.070	-0.025	-0.039	0.270	-0.317**	-0.133*	-0.018	0.086	-0.251+	-0.091	-0.022	-0.042	-0.100
	(0.136)	(0.071)	(0.042)	(0.070)	(0.066)	(0.361)	(0.110)	(0.061)	(0.106)	(0.114)	(0.148)	(0.094)	(0.062)	(0.093)	(0.081)																(0.137)	(0.073)	(0.044)	(0.070)	(0.067)	(0.361)	(0.114)	(0.063)	(0.107)	(0.117)	(0.149)	(0.096)	(0.064)	(0.095)	(0.083)
Depressive Symptoms PGS	-0.025	-0.102	-0.060	0.032	-0.061	-0.350	-0.121	-0.145*	0.114	-0.126	0.020	-0.090	0.039	-0.037	-0.032																-0.024	-0.102	-0.049	0.029	-0.071	-0.468	-0.138	-0.148*	0.082	-0.140	0.027	-0.088	0.043	-0.031	-0.040
	(0.136)	(0.070)	(0.042)	(0.069)	(0.066)	(0.360)	(0.110)	(0.061)	(0.106)	(0.115)	(0.147)	(0.092)	(0.061)	(0.092)	(0.080)																(0.137)	(0.071)	(0.044)	(0.070)	(0.067)	(0.380)	(0.111)	(0.063)	(0.107)	(0.117)	(0.149)	(0.093)	(0.063)	(0.094)	(0.082)
BMI PGS	0.143	0.016	0.027	-0.016	0.056	0.412	0.057	-0.044	0.095	0.084	0.091	-0.016	0.135*	-0.088	0.057																0.109	0.007	0.037	-0.013	0.043	0.415	0.007	-0.060	0.065	0.068	0.069	-0.019	0.138*	-0.078	0.053
	(0.141)	(0.073)	(0.043)	(0.072)	(0.068)	(0.382)	(0.111)	(0.062)	(0.110)	(0.119)	(0.153)	(0.098)	(0.063)	(0.097)	(0.084)																(0.140)	(0.074)	(0.046)	(0.073)	(0.069)	(0.384)	(0.114)	(0.064)	(0.112)	(0.122)	(0.153)	(0.100)	(0.066)	(0.098)	(0.086)
Socioeconomic Status
Years of Education																-0.154*	0.133***	0.212***	0.083**	-0.072*	-0.249	0.063	0.152***	0.058	-0.076	-0.131+	0.206***	0.286***	0.109*	-0.075+	-0.156*	0.113***	0.191***	0.094**	-0.050	-0.337+	0.043	0.130***	0.058	-0.032	-0.134+	0.190***	0.265***	0.125**	-0.067+
																(0.063)	(0.033)	(0.020)	(0.032)	(0.030)	(0.154)	(0.048)	(0.027)	(0.046)	(0.048)	(0.070)	(0.045)	(0.031)	(0.045)	(0.039)	(0.064)	(0.034)	(0.021)	(0.033)	(0.031)	(0.175)	(0.051)	(0.028)	(0.048)	(0.051)	(0.072)	(0.047)	(0.032)	(0.047)	(0.040)
Mother's Education																0.099+	-0.014	-0.008	-0.012	0.013	0.291+	-0.027	-0.010	0.001	-0.023	0.071	-0.014	-0.012	-0.024	0.033	0.109+	-0.003	-0.002	-0.016	0.019	0.319*	-0.011	-0.001	-0.000	-0.006	0.084	-0.005	-0.009	-0.030	0.034
																(0.057)	(0.030)	(0.018)	(0.029)	(0.028)	(0.150)	(0.047)	(0.025)	(0.045)	(0.050)	(0.062)	(0.039)	(0.026)	(0.039)	(0.035)	(0.057)	(0.030)	(0.018)	(0.030)	(0.029)	(0.161)	(0.047)	(0.025)	(0.046)	(0.051)	(0.062)	(0.040)	(0.026)	(0.040)	(0.035)
Father's Education																-0.011	0.024	0.019	0.009	0.011	-0.031	0.073+	0.050*	0.051	0.043	-0.012	-0.010	-0.010	-0.020	-0.005	-0.015	0.023	0.017	0.008	0.015	-0.012	0.078+	0.052*	0.049	0.048	-0.018	-0.010	-0.015	-0.024	-0.004
																(0.046)	(0.025)	(0.015)	(0.024)	(0.023)	(0.118)	(0.040)	(0.021)	(0.038)	(0.042)	(0.050)	(0.033)	(0.022)	(0.033)	(0.028)	(0.047)	(0.025)	(0.015)	(0.025)	(0.024)	(0.133)	(0.040)	(0.021)	(0.038)	(0.042)	(0.050)	(0.033)	(0.022)	(0.033)	(0.029)
Childhood SES (Ref. = Poor)
Average																-0.338	-0.285+	-0.021	-0.270+	-0.152	1.079	-0.253	-0.132	-0.554*	0.269	-0.508	-0.328	0.150	-0.012	-0.363*	-0.325	-0.305+	-0.048	-0.252	-0.147	1.073	-0.315	-0.178	-0.540*	0.258	-0.484	-0.359+	0.109	0.025	-0.331+
																(0.293)	(0.163)	(0.104)	(0.162)	(0.155)	(1.086)	(0.255)	(0.141)	(0.233)	(0.289)	(0.310)	(0.212)	(0.160)	(0.231)	(0.185)	(0.295)	(0.164)	(0.105)	(0.163)	(0.156)	(1.118)	(0.257)	(0.142)	(0.235)	(0.293)	(0.314)	(0.214)	(0.162)	(0.233)	(0.187)
Well Off																-0.752	-0.276	0.179	0.260	0.127	-12.974	-0.190	-0.015	-0.238	0.044	-0.648	-0.433	0.369	0.625+	0.161	-0.753	-0.313	0.120	0.284	0.182	-12.906	-0.336	-0.090	-0.206	0.054	-0.642	-0.448	0.278	0.673*	0.225
																(0.651)	(0.273)	(0.163)	(0.244)	(0.249)	(909.946)	(0.413)	(0.234)	(0.381)	(0.483)	(0.658)	(0.369)	(0.232)	(0.325)	(0.292)	(0.656)	(0.276)	(0.165)	(0.246)	(0.251)	(698.966)	(0.420)	(0.237)	(0.385)	(0.486)	(0.665)	(0.372)	(0.236)	(0.330)	(0.296)
Varied or Missing																0.529	-0.213	0.474	0.111	-0.251	-12.563	0.607	0.430	0.660	-12.979	0.523	-0.898	0.701	-0.601	-0.146	0.581	-0.248	0.451	0.110	-0.258	-11.938	0.704	0.463	0.590	-13.301	0.644	-1.003	0.649	-0.528	-0.127
																(0.773)	(0.624)	(0.322)	(0.552)	(0.624)	(2,585.732)	(0.821)	(0.477)	(0.695)	(815.654)	(0.781)	(1.042)	(0.446)	(1.048)	(0.642)	(0.779)	(0.625)	(0.324)	(0.554)	(0.625)	(2,866.650)	(0.825)	(0.481)	(0.706)	(933.666)	(0.790)	(1.045)	(0.457)	(1.051)	(0.646)
Female																1.102**	-0.453***	-0.881***	-0.474***	-0.057											1.096**	-0.463***	-0.891***	-0.471***	-0.057
																(0.346)	(0.132)	(0.080)	(0.129)	(0.127)											(0.347)	(0.132)	(0.080)	(0.129)	(0.128)
Birth Year																0.035+	0.060***	0.011	0.061***	0.066***	-0.064	0.085***	0.014	0.067**	0.070**	0.041*	0.050***	0.008	0.064***	0.063***	0.036+	0.062***	0.012	0.061***	0.064***	-0.054	0.086***	0.016	0.069**	0.066**	0.039+	0.052***	0.011	0.062***	0.061***
																(0.020)	(0.011)	(0.009)	(0.011)	(0.011)	(0.080)	(0.021)	(0.013)	(0.021)	(0.024)	(0.020)	(0.014)	(0.012)	(0.014)	(0.012)	(0.021)	(0.012)	(0.009)	(0.011)	(0.011)	(0.083)	(0.021)	(0.013)	(0.021)	(0.024)	(0.020)	(0.014)	(0.012)	(0.014)	(0.012)
Birth Cohort (Ref. = Cohorts 0-3; <1924 to 1947)
Cohorts 4 & 5: 1948 to 1959																-0.224	-0.394*	-0.166	0.131	0.260	0.914	-0.436	-0.330	-0.198	0.492	-0.272	-0.472+	0.035	0.342	0.146	-0.271	-0.445*	-0.178	0.145	0.259	0.671	-0.475	-0.361+	-0.225	0.534	-0.281	-0.549*	0.032	0.375	0.168
																(0.354)	(0.200)	(0.139)	(0.192)	(0.185)	(1.246)	(0.334)	(0.204)	(0.325)	(0.373)	(0.366)	(0.257)	(0.198)	(0.245)	(0.217)	(0.358)	(0.202)	(0.140)	(0.193)	(0.186)	(1.284)	(0.336)	(0.207)	(0.330)	(0.381)	(0.371)	(0.260)	(0.200)	(0.247)	(0.219)
Cohorts 6 & 7: 1960 to 1971																-0.368	0.217	0.804***	0.042	0.329	1.830	0.138	0.667*	0.039	0.549	-0.514	0.119	0.983***	-0.039	0.248	-0.418	0.154	0.768***	0.066	0.342	1.593	0.052	0.594+	-0.016	0.669	-0.496	0.054	0.962**	0.016	0.278
																(0.540)	(0.273)	(0.210)	(0.280)	(0.262)	(2.007)	(0.468)	(0.315)	(0.485)	(0.545)	(0.551)	(0.344)	(0.292)	(0.354)	(0.301)	(0.547)	(0.274)	(0.211)	(0.281)	(0.263)	(2.054)	(0.472)	(0.319)	(0.493)	(0.557)	(0.558)	(0.346)	(0.295)	(0.357)	(0.304)
Population Stratification
PC1_5A	0.819	-0.106	-0.000	9.301	-10.892	24.483	-4.303	-2.715	-0.732	-26.351+	-0.687	0.695	-0.418	16.479	-0.868																2.773	-4.632	-6.779	5.713	-12.946	30.626	-8.280	-7.046	-4.044	-27.930+	0.455	-4.021	-6.347	13.829	-2.614
	(14.624)	(7.027)	(3.973)	(7.861)	(8.029)	(47.830)	(10.260)	(5.783)	(11.678)	(14.025)	(15.734)	(9.774)	(5.727)	(10.725)	(10.131)																(14.950)	(7.375)	(4.258)	(8.111)	(8.339)	(51.129)	(10.770)	(6.014)	(11.956)	(14.421)	(15.951)	(10.291)	(6.125)	(11.046)	(10.599)
PC1_5B	-5.487	-14.105*	-0.563	7.522	9.181	-40.591+	-10.839	-2.932	-0.607	3.312	1.889	-18.296*	2.513	14.168	12.321																-8.271	-13.441*	-0.057	10.297	11.128	-51.804+	-10.803	-3.334	1.229	7.603	-0.886	-17.399*	4.913	17.876	12.770
	(12.195)	(6.195)	(4.271)	(7.640)	(7.411)	(24.200)	(9.300)	(5.980)	(10.828)	(12.443)	(14.309)	(8.442)	(6.497)	(11.000)	(9.262)																(12.490)	(6.430)	(4.508)	(7.829)	(7.711)	(27.105)	(9.786)	(6.174)	(11.122)	(13.086)	(14.545)	(8.782)	(6.867)	(11.267)	(9.622)
PC1_5C	11.692	-3.421	0.224	-1.004	-0.224	36.906	-9.943	-6.612	4.183	16.775	8.425	-0.408	4.947	-6.313	-7.498																12.528	-3.621	-0.409	0.335	0.189	39.124	-8.901	-6.272	6.997	19.051	8.395	0.082	5.413	-6.002	-7.898
	(15.850)	(8.185)	(4.851)	(8.041)	(7.607)	(43.051)	(12.594)	(7.026)	(12.401)	(13.354)	(17.006)	(10.959)	(7.078)	(10.729)	(9.332)																(15.776)	(8.349)	(5.104)	(8.162)	(7.738)	(43.873)	(13.010)	(7.261)	(12.681)	(13.840)	(17.009)	(11.124)	(7.328)	(10.836)	(9.465)
PC1_5D	-21.930	-12.588+	-12.627**	-3.594	0.948	-71.536*	-27.852**	-14.761*	-4.918	0.294	-10.855	1.624	-11.170+	-1.084	1.392																-22.284	-10.544	-9.947*	-1.347	3.399	-77.370*	-25.556*	-12.163*	-3.067	3.867	-9.555	1.040	-11.062+	0.084	3.552
	(13.410)	(6.999)	(4.126)	(6.852)	(6.763)	(32.429)	(10.080)	(5.802)	(10.415)	(11.931)	(15.128)	(9.787)	(6.125)	(9.247)	(8.276)																(13.814)	(7.210)	(4.326)	(7.006)	(7.006)	(32.058)	(10.546)	(5.995)	(10.748)	(12.259)	(15.564)	(10.054)	(6.415)	(9.438)	(8.624)
PC1_5E	-3.095	-8.493	-16.057***	3.147	0.396	-3.569	-8.151	-12.529*	3.184	-7.578	-5.755	-9.516	-18.395**	3.378	5.990																-9.774	-6.702	-12.278**	6.136	0.790	-6.977	-8.442	-10.561+	3.070	-9.035	-11.961	-7.718	-13.570*	9.216	7.225
	(14.470)	(6.892)	(3.882)	(7.694)	(8.027)	(46.466)	(9.946)	(5.597)	(11.424)	(13.941)	(15.676)	(9.713)	(5.648)	(10.497)	(10.195)																(14.725)	(7.190)	(4.132)	(7.916)	(8.344)	(50.647)	(10.438)	(5.790)	(11.672)	(14.286)	(15.842)	(10.144)	(5.995)	(10.828)	(10.692)
PC6_10A	6.499	-6.250	4.089	-1.178	-0.684	20.998	-10.408	4.847	15.474	-2.487	5.517	-4.193	2.061	-15.043	0.541																8.097	-6.922	1.791	-1.139	0.547	26.429	-7.110	4.941	18.497+	1.669	6.258	-5.343	0.341	-16.121+	-0.431
	(13.775)	(7.125)	(4.230)	(7.002)	(6.637)	(38.197)	(11.067)	(6.103)	(10.581)	(11.468)	(14.857)	(9.451)	(6.188)	(9.400)	(8.154)																(13.807)	(7.304)	(4.451)	(7.160)	(6.788)	(41.576)	(11.447)	(6.266)	(10.824)	(11.843)	(15.062)	(9.663)	(6.462)	(9.612)	(8.355)
PC6_10B	-1.216	-8.953	-1.399	-2.503	5.191	10.176	5.364	-2.805	-13.603	0.711	-5.056	-20.303*	1.999	8.290	7.874																-1.656	-8.916	-0.220	-1.341	5.703	9.883	8.632	-0.363	-10.501	4.430	-5.135	-24.012*	-1.867	8.527	8.168
	(13.731)	(7.098)	(4.192)	(6.981)	(6.602)	(36.895)	(10.613)	(5.887)	(10.347)	(11.188)	(14.996)	(9.588)	(6.250)	(9.532)	(8.281)																(13.962)	(7.322)	(4.401)	(7.149)	(6.829)	(37.011)	(11.048)	(6.081)	(10.618)	(11.634)	(15.250)	(9.880)	(6.522)	(9.779)	(8.577)
PC6_10C	8.452	-9.000	-0.452	4.771	4.225	-74.740+	-5.270	2.447	0.112	-0.157	20.369	-12.364	-5.819	7.663	5.228																8.884	-9.736	-0.709	4.539	3.378	-76.844+	-3.077	4.010	1.771	0.580	20.387	-14.500	-6.725	6.054	3.194
	(14.114)	(7.104)	(4.252)	(7.054)	(6.721)	(42.326)	(10.822)	(6.052)	(10.907)	(11.744)	(15.160)	(9.470)	(6.308)	(9.373)	(8.263)																(14.119)	(7.318)	(4.476)	(7.210)	(6.858)	(43.727)	(11.209)	(6.237)	(11.177)	(12.028)	(15.223)	(9.780)	(6.601)	(9.577)	(8.460)
PC6_10D	8.761	5.666	2.419	-0.417	12.163+	49.982	1.500	2.646	0.690	16.468	-0.241	9.976	4.937	-0.500	9.213																8.434	5.040	2.275	-0.781	10.972	71.346+	1.007	2.768	0.110	17.824	-0.423	7.885	2.630	-0.670	7.366
	(13.557)	(7.001)	(4.156)	(6.896)	(6.537)	(33.747)	(10.512)	(5.857)	(10.265)	(11.064)	(14.920)	(9.491)	(6.168)	(9.392)	(8.152)																(13.718)	(7.151)	(4.356)	(7.008)	(6.687)	(36.957)	(10.905)	(6.035)	(10.491)	(11.424)	(14.963)	(9.635)	(6.399)	(9.551)	(8.331)
PC6_10E	-13.422	5.167	-7.880+	-13.270*	-5.479	-39.432	1.508	-3.308	-23.463*	-7.933	-9.435	8.395	-14.663*	-4.367	-3.781																-13.421	3.731	-8.685*	-14.237*	-5.975	-35.341	0.280	-3.486	-23.699*	-10.324	-9.067	7.077	-17.149**	-6.203	-3.149
	(13.424)	(7.347)	(4.166)	(6.745)	(6.558)	(33.286)	(10.785)	(5.844)	(9.801)	(10.777)	(14.984)	(10.073)	(6.182)	(9.419)	(8.318)																(13.710)	(7.453)	(4.352)	(6.852)	(6.730)	(33.960)	(11.047)	(6.043)	(9.999)	(11.006)	(15.080)	(10.200)	(6.448)	(9.607)	(8.557)
Constant	-3.867***	-2.498***	-1.252***	-2.413***	-2.317***	-5.491***	-2.248***	-0.749***	-2.167***	-2.391***	-3.609***	-2.693***	-1.709***	-2.621***	-2.314***	-71.838+	-121.492***	-24.467	-122.553***	-129.829***	118.230	-168.689***	-29.565	-132.462***	-139.100**	-81.982*	-101.261***	-22.002	-127.721***	-123.172***	-72.458+	-123.614***	-27.371+	-121.615***	-126.021***	99.612	-171.171***	-34.097	-137.310***	-131.259**	-78.656*	-105.399***	-26.823	-124.775***	-120.043***
	(0.129)	(0.067)	(0.039)	(0.063)	(0.061)	(0.527)	(0.102)	(0.055)	(0.098)	(0.111)	(0.141)	(0.092)	(0.059)	(0.087)	(0.076)	(39.397)	(22.143)	(16.473)	(22.153)	(20.944)	(154.235)	(39.877)	(25.226)	(40.156)	(45.553)	(39.111)	(26.994)	(22.562)	(27.246)	(23.582)	(40.028)	(22.264)	(16.589)	(22.216)	(21.160)	(159.507)	(40.256)	(25.511)	(40.946)	(46.631)	(39.530)	(27.157)	(22.825)	(27.443)	(23.781)
Observations	4,922					1,965					2,957					4,922					1,965					2,957					4,922					1,965					2,957
Pseudo R-squared	0.0138					0.0249					0.0178					0.0691					0.0577					0.0622					0.0776					0.0781					0.0750
(-2)Log-likelihood	11276					4676					6348					10644					4518					6062					10546					4420					5978
Chi-squared	157.4					119.5					114.8					790.1					276.6					401.8					887.7					374.5					484.6
Standard errors in parentheses
*** p<0.001, ** p<0.01, * p<0.05, + p<0.1

## Sheet: Tab S10. LCA ordered logit SRH
Table S10. Ordered logit models predicting self‑rated health using partnership trajectory clusters based on latent class analysis (LCA) among non‑Hispanic White respondents
	Model 1			Model 2			Model 3			Model 4			Model 5
	Cluster			PGS			Cluster + PGS			Clusters + SES			Cluster + PGS + SES
	All	Male	Female	All	Male	Female	All	Male	Female	All	Male	Female	All	Male	Female
VARIABLES	Coef (S.E.)	Coef (S.E.)	Coef (S.E.)	Coef (S.E.)	Coef (S.E.)	Coef (S.E.)	Coef (S.E.)	Coef (S.E.)	Coef (S.E.)	Coef (S.E.)	Coef (S.E.)	Coef (S.E.)	Coef (S.E.)	Coef (S.E.)	Coef (S.E.)
Partnership Trajectory (Ref. = Continuously Married)
Widowed	-0.577*	-0.863	-0.527*				-0.520*	-0.815	-0.466+	-0.430+	-0.752	-0.377	-0.403+	-0.731	-0.332
	(0.224)	(0.580)	(0.243)				(0.227)	(0.584)	(0.246)	(0.226)	(0.593)	(0.244)	(0.227)	(0.592)	(0.246)
Never Married	-0.352**	-0.450**	-0.265+				-0.380**	-0.498**	-0.281+	-0.284*	-0.351*	-0.231	-0.289*	-0.379*	-0.238
	(0.116)	(0.172)	(0.159)				(0.117)	(0.174)	(0.160)	(0.119)	(0.177)	(0.161)	(0.119)	(0.178)	(0.162)
Married Late	0.056	0.074	0.031				-0.001	0.004	-0.009	-0.004	0.005	-0.019	-0.014	-0.027	-0.013
	(0.068)	(0.097)	(0.099)				(0.069)	(0.098)	(0.100)	(0.072)	(0.102)	(0.104)	(0.073)	(0.103)	(0.105)
Divorced Early and Remarried	-0.240*	-0.086	-0.370*				-0.240*	-0.056	-0.376*	-0.180	-0.004	-0.329*	-0.173	0.026	-0.334*
	(0.117)	(0.176)	(0.157)				(0.117)	(0.176)	(0.158)	(0.117)	(0.177)	(0.158)	(0.118)	(0.177)	(0.159)
Remarried	-0.313**	-0.484**	-0.215				-0.275*	-0.405*	-0.184	-0.079	-0.258	0.018	-0.072	-0.238	0.032
	(0.108)	(0.179)	(0.135)				(0.109)	(0.182)	(0.136)	(0.111)	(0.185)	(0.139)	(0.112)	(0.188)	(0.140)
Polygenic Scores
Educational Attainment PGS				0.133***	0.192***	0.092*	0.129***	0.185***	0.088*				0.012	0.070	-0.035
				(0.028)	(0.045)	(0.037)	(0.028)	(0.045)	(0.037)				(0.030)	(0.047)	(0.039)
Well-being PGS				0.111***	0.057	0.144***	0.107***	0.054	0.140***				0.095**	0.037	0.130***
				(0.029)	(0.047)	(0.037)	(0.029)	(0.047)	(0.037)				(0.029)	(0.047)	(0.037)
Depressive Symptoms PGS				-0.061*	-0.058	-0.065+	-0.063*	-0.062	-0.066+				-0.068*	-0.080+	-0.065+
				(0.028)	(0.046)	(0.036)	(0.029)	(0.046)	(0.036)				(0.029)	(0.047)	(0.037)
BMI PGS				-0.202***	-0.254***	-0.167***	-0.202***	-0.254***	-0.168***				-0.212***	-0.253***	-0.186***
				(0.030)	(0.048)	(0.038)	(0.030)	(0.048)	(0.038)				(0.030)	(0.049)	(0.039)
Socioeconomic Status
Years of Education										0.160***	0.179***	0.146***	0.152***	0.163***	0.147***
										(0.013)	(0.020)	(0.018)	(0.014)	(0.021)	(0.018)
Mother's Education										0.047***	0.049*	0.048**	0.049***	0.059**	0.048**
										(0.012)	(0.019)	(0.015)	(0.012)	(0.020)	(0.015)
Father's Education										0.010	0.015	0.008	0.009	0.011	0.008
										(0.010)	(0.016)	(0.013)	(0.010)	(0.016)	(0.013)
Childhood SES (Ref. = Poor)
Average										0.226***	0.237*	0.221*	0.200**	0.211*	0.189*
										(0.067)	(0.106)	(0.087)	(0.067)	(0.107)	(0.088)
Well Off										0.200+	0.072	0.287*	0.179	0.046	0.261+
										(0.113)	(0.181)	(0.146)	(0.114)	(0.182)	(0.147)
Varied or Missing										0.310	0.567	0.137	0.294	0.561	0.107
										(0.231)	(0.383)	(0.291)	(0.232)	(0.387)	(0.294)
Female										0.074			0.089
										(0.055)			(0.055)
Birth Year										-0.042***	-0.035*	-0.045***	-0.040***	-0.037**	-0.044***
										(0.008)	(0.014)	(0.009)	(0.008)	(0.014)	(0.010)
Birth Cohort (Ref. = Cohorts 0-3; <1924 to 1947)
Cohorts 4 & 5: 1948 to 1959										-0.271**	-0.291+	-0.278*	-0.300**	-0.258	-0.313**
										(0.095)	(0.171)	(0.116)	(0.096)	(0.172)	(0.117)
Cohorts 6 & 7: 1960 to 1971										-0.305+	-0.362	-0.286	-0.346*	-0.310	-0.331+
										(0.160)	(0.283)	(0.196)	(0.161)	(0.284)	(0.198)
Age Outcome was Measured										-0.052***	-0.046***	-0.057***	-0.053***	-0.049***	-0.057***
										(0.008)	(0.013)	(0.010)	(0.008)	(0.013)	(0.010)
Population Stratification
PC1_5A				2.044	3.624	0.706	1.958	3.114	0.873				-3.203	-2.220	-4.636
				(3.034)	(4.614)	(4.093)	(3.032)	(4.609)	(4.097)				(3.102)	(4.715)	(4.202)
PC1_5B				-3.039	-0.170	-5.255	-3.263	-0.679	-5.276				-5.187+	-2.111	-7.779*
				(2.884)	(4.530)	(3.751)	(2.887)	(4.548)	(3.756)				(2.937)	(4.629)	(3.818)
PC1_5C				-4.153	-7.232	-1.941	-4.219	-7.023	-2.163				-3.174	-5.363	-1.342
				(3.339)	(5.399)	(4.262)	(3.342)	(5.408)	(4.266)				(3.373)	(5.486)	(4.306)
PC1_5D				3.044	8.952*	-1.148	2.707	8.205+	-1.306				2.477	9.416*	-2.487
				(2.837)	(4.458)	(3.700)	(2.844)	(4.476)	(3.707)				(2.877)	(4.562)	(3.745)
PC1_5E				-5.757+	-6.008	-4.052	-5.784+	-6.300	-4.072				-4.633	-4.900	-3.155
				(2.995)	(4.502)	(4.088)	(2.998)	(4.500)	(4.098)				(3.060)	(4.601)	(4.187)
PC6_10A				5.065+	5.255	5.178	4.995+	4.918	5.004				3.605	2.390	4.153
				(2.893)	(4.641)	(3.712)	(2.894)	(4.651)	(3.714)				(2.922)	(4.704)	(3.748)
PC6_10B				1.636	3.146	1.094	1.492	3.308	0.976				1.443	3.181	1.204
				(2.880)	(4.505)	(3.761)	(2.881)	(4.516)	(3.765)				(2.913)	(4.580)	(3.811)
PC6_10C				-1.083	2.757	-2.889	-0.997	2.464	-2.578				-0.877	2.344	-2.412
				(2.907)	(4.661)	(3.741)	(2.910)	(4.665)	(3.747)				(2.935)	(4.718)	(3.783)
PC6_10D				-1.236	8.744+	-7.828*	-0.942	9.324*	-7.685*				-0.856	9.645*	-7.366*
				(2.846)	(4.498)	(3.698)	(2.848)	(4.505)	(3.701)				(2.873)	(4.551)	(3.741)
PC6_10E				0.151	1.293	-0.811	0.112	1.162	-0.617				0.477	3.458	-1.212
				(2.871)	(4.428)	(3.784)	(2.874)	(4.436)	(3.794)				(2.895)	(4.484)	(3.828)
/cut1	-3.805***	-3.790***	-3.817***	-3.767***	-3.762***	-3.784***	-3.834***	-3.837***	-3.846***	-82.369***	-69.554**	-89.015***	-79.162***	-73.473**	-86.525***
	(0.098)	(0.154)	(0.126)	(0.095)	(0.150)	(0.124)	(0.098)	(0.155)	(0.126)	(15.052)	(26.972)	(18.322)	(15.126)	(27.037)	(18.491)
/cut2	-2.244***	-2.302***	-2.209***	-2.200***	-2.264***	-2.171***	-2.264***	-2.335***	-2.230***	-80.773***	-68.025*	-87.375***	-77.559***	-71.933**	-84.878***
	(0.052)	(0.086)	(0.065)	(0.048)	(0.077)	(0.061)	(0.052)	(0.087)	(0.066)	(15.051)	(26.970)	(18.321)	(15.125)	(27.035)	(18.490)
/cut3	-0.659***	-0.636***	-0.674***	-0.597***	-0.565***	-0.622***	-0.656***	-0.630***	-0.678***	-79.112***	-66.268*	-85.773***	-75.881***	-70.146**	-83.260***
	(0.036)	(0.061)	(0.045)	(0.030)	(0.048)	(0.039)	(0.037)	(0.061)	(0.046)	(15.050)	(26.968)	(18.319)	(15.123)	(27.032)	(18.488)
/cut4	0.911***	0.893***	0.923***	0.998***	1.005***	0.998***	0.943***	0.949***	0.947***	-77.442***	-64.625*	-84.081***	-74.190***	-68.470*	-81.545***
	(0.038)	(0.062)	(0.047)	(0.032)	(0.052)	(0.042)	(0.038)	(0.064)	(0.048)	(15.048)	(26.966)	(18.316)	(15.121)	(27.031)	(18.485)
Observations	4,899	1,962	2,937	4,899	1,962	2,937	4,899	1,962	2,937	4,899	1,962	2,937	4,899	1,962	2,937
Pseudo R-squared	0.00210	0.00335	0.00179	0.00998	0.0165	0.00853	0.0117	0.0192	0.0101	0.0343	0.0407	0.0313	0.0406	0.0512	0.0380
(-2)Log-likelihood	13264	5294	7962	13158	5224	7908	13134	5210	7896	12836	5096	7726	12752	5040	7672
Chi-squared	27.85	17.79	14.27	132.6	87.67	68.04	156.0	102.2	80.51	455.7	216.2	249.8	539.7	271.8	302.8
Standard errors in parentheses
*** p<0.001, ** p<0.01, * p<0.05, + p<0.1

[truncated: 5 more sheets: Tab S11. LCA neg binom CESD, Tab S12. Descriptive(non-His B), Tab S13. AA multi logit cluster, Tab S14. AA ordered logit SRH, Tab S15. AA neg binom CESD]
